# Network Analysis Reveals Different Cellulose Degradation Strategies across *Trichoderma Harzianum* Strains Associated with XYR1 and CRE1

1 **Rafaela Rossi Rosolen<sup>1,2</sup>, Alexandre Hild Aono<sup>1,2</sup>, Déborah Aires Almeida<sup>1,2</sup>, Jaire Alves**  
2 **Ferreira Filho<sup>1,2</sup>, Maria Augusta Crivelente Horta<sup>1</sup>, Anete Pereira de Souza<sup>1,3\*</sup>**

3 <sup>1</sup>Center for Molecular Biology and Genetic Engineering (CBMEG), University of Campinas  
4 (UNICAMP), Cidade Universitária Zeferino Vaz, Campinas, SP, Brazil

5 <sup>2</sup>Graduate Program in Genetics and Molecular Biology, Institute of Biology, UNICAMP, Campinas,  
6 SP, Brazil

7 <sup>3</sup>Department of Plant Biology, Institute of Biology, UNICAMP, Cidade Universitária Zeferino Vaz,  
8 Rua Monteiro Lobato, Campinas, SP, Brazil

9 **\* Correspondence:**

10 Anete Pereira de Souza

11 anete@unicamp.br

12 **Number of words: 9013**

13 **The number of figures: 9**

14 **The number of tables: 3**

15 **Keywords: *Trichoderma harzianum*, *Trichoderma atroviride*, cellulose, transcription factors,**  
16 **coexpression networks**

17 **Abstract**

18 *Trichoderma harzianum*, whose gene expression is tightly controlled by the transcription factors  
19 (TFs) XYR1 and CRE1, is a potential candidate for hydrolytic enzyme production. Here, we  
20 performed a network analysis of *T. harzianum* IOC-3844 and *T. harzianum* CBMAI-0179 to explore  
21 how the regulation of these TFs varies between these strains. In addition, we explored the  
22 evolutionary relationships of XYR1 and CRE1 protein sequences among *Trichoderma* spp. The  
23 results of the *T. harzianum* strains were compared with those of *Trichoderma atroviride* CBMAI-  
24 0020, a mycoparasitic species. Although transcripts encoding carbohydrate-active enzymes  
25 (CAZymes), TFs, transporters, and proteins with unknown functions were coexpressed with *cre1* or  
26 *xyl1*, other proteins indirectly related to cellulose degradation were identified. The enriched GO  
27 terms describing the transcripts of these groups differed across all strains, and several metabolic  
28 pathways with high similarity between both regulators but strain-specific differences were identified.  
29 In addition, the CRE1 and XYR1 subnetworks presented different topology profiles in each strain,  
30 likely indicating differences in the influences of these regulators according to the fungi. The hubs of  
31 the *cre1* and *xyl1* groups included transcripts not yet characterized or described as being related to  
32 cellulose degradation. The first-neighbor analyses confirmed the results of the profile of the  
33 coexpressed transcripts in *cre1* and *xyl1*. The analyses of the shortest paths revealed that CAZymes  
34 upregulated under cellulose degradation conditions are most closely related to both regulators, and

## Degradation

35 new targets between such signaling pathways were discovered. Although the evaluated *T. harzianum*  
36 strains are phylogenetically close and their amino acid sequences related to XYR1 and CRE1 are  
37 very similar, the set of transcripts related to *xyl1* and *cre1* differed, suggesting that each *T.*  
38 *harzianum* strain used a specific regulation strategy for cellulose degradation. More interestingly, our  
39 findings may suggest that XYR1 and CRE1 indirectly regulate genes encoding proteins related to  
40 cellulose degradation in the evaluated *T. harzianum* strains. We believe that our findings are  
41 important for expanding the use of *T. harzianum* as an enzyme producer in biotechnological  
42 industrial applications and pave the way for further studies evaluating differences across strains of  
43 the same species.

## 44 1 Introduction

45 Lignocellulosic biomass is a complex recalcitrant structure that requires a consortium of  
46 carbohydrate-active enzymes (CAZymes) (Lombard et al., 2014) for its complete depolymerization.  
47 Due to their unique ability to secrete these proteins efficiently, filamentous fungi, such as  
48 *Trichoderma* spp. and *Aspergillus* spp., are widely explored for the industrial production of  
49 CAZymes (de Assis et al., 2015; Bischof et al., 2016). In the genus *Trichoderma*, *Trichoderma reesei*  
50 is the primary fungal industrial source of cellulases and hemicellulases (Martinez et al., 2008), while  
51 *Trichoderma harzianum* and *Trichoderma atroviride* have been widely explored by examining their  
52 biocontrol capacity against plant pathogenic fungi (Medeiros et al., 2017; Saravanakumar et al.,  
53 2017). However, hydrolytic enzymes from *T. harzianum* strains have demonstrated great potential in  
54 the conversion of lignocellulosic biomass into fermentable sugars (Delabona et al., 2020; Zhang et  
55 al., 2020).

56 The production of CAZymes in filamentous fungi is controlled at the transcriptional level by several  
57 positive and negative transcription factors (TFs) (Benocci et al., 2017). In *T. reesei*, the Zn<sub>2</sub>Cys<sub>6</sub>-type  
58 TF xylanase regulator 1 (XYR1) is described as the most important activator of cellulase and  
59 xylanase gene expression (Stricker et al., 2006). During growth on an induction carbon source,  
60 XYR1 was shown to be synthesized *de novo* and degraded at the end of induction (Lichius et al.,  
61 2014). Although XYR1 orthologs are present in almost all filamentous ascomycete fungi, the  
62 molecular mechanisms triggered by this regulator depend on the species (Klaubauf et al., 2014). In *T.*  
63 *atroviride*, the induction of genes encoding cell wall-degrading enzymes considered relevant for  
64 mycoparasitism, such as *axe1* and *swol1*, was influenced by XYR1 (Reithner et al., 2014). In *T.*  
65 *harzianum*, the overexpression of *xyl1* increased the levels of the reducing sugars released in a  
66 shorter time during saccharification (Delabona et al., 2017). Overall, in the genus *Trichoderma*,  
67 XYR1 evolved by vertical gene transfer (Druzhinina et al., 2018).

68 In the presence of easily metabolizable carbon sources, such as glucose, the expression of *xyl1* and  
69 genes encoding lignocellulose-degrading enzymes is repressed by carbon catabolite repression  
70 (CCR), which is regulated by the C<sub>2</sub>H<sub>2</sub>-type TF carbon catabolite repressor 1 (CRE1) (Strauss et al.,  
71 1995; Mach-Aigner et al., 2008; Alazi and Ram, 2018). Upon glucose depletion, the concentration of  
72 CRE1 in the nucleus rapidly decreases, and CRE1 is recycled into the cytoplasm (Lichius et al.,  
73 2014). Furthermore, the phosphorylation of CRE1 plays an essential role in signal transduction to  
74 achieve CCR (Horta et al., 2019; Han et al., 2020). CRE1 is the only conserved TF throughout the  
75 fungal kingdom, suggesting a conserved mechanism for CCR in fungi (Adnan et al., 2017).  
76 Interestingly, the effect of *cre1* deletion on the gene expression profile of its targets varies among  
77 species. In *T. reesei* RUT-C30, a full *cre1* deletion led to pleiotropic effects and strong growth  
78 impairment (Portnoy et al., 2011; Mello-de-Sousa et al., 2014), whereas in *T. harzianum* P49P11, it  
79 increased the expression levels of CAZyme genes and *xyl1* (Delabona et al., 2021).

## XYR1 and CRE1 Response to Cellulose

### Degradation

80 Although *T. harzianum* strains have shown high cellulolytic activity (Horta et al., 2018; Li et al.,  
81 2020b), most studies investigating this species have focused on biological control (Maruyama et al.,  
82 2020; Yan and Khan, 2021). Thus, the regulatory mechanisms underlying hydrolytic enzyme  
83 production by these fungi are still poorly explored at the transcriptional level (Delabona et al., 2017,  
84 2020, 2021). In addition, given the high degree of genetic variation observed within the genus  
85 *Trichoderma* (Kubicek et al., 2019) along with the complex speciation observed in the *T. harzianum*  
86 species (Druzhinina et al., 2010), it is necessary to explore how the main regulators XYR1 and CRE1  
87 behave across *T. harzianum* strains.

88 Previously, the transcriptomes of *T. harzianum* IOC-3844 (Th3844), *T. harzianum* CBMAI-0179  
89 (Th0179), and *T. atroviride* CBMAI-0020 (Ta0020) were investigated under cellulose degradation  
90 conditions (Almeida et al., 2021). Different types of enzymatic profiles were reported, and both *T.*  
91 *harzianum* strains had higher cellulase activity than *T. atroviride*. Using this dataset, we aimed to  
92 investigate how the regulation of the TFs CRE1 and XYR1 varies among *T. harzianum* strains. Based  
93 on the assumption that coexpressed genes tend to share similar expression patterns and that they  
94 could be coregulated by the same elements, we modeled a network of Th3844, Th0179, and Ta0020  
95 using a weighted correlation network analysis (WGCNA) (Langfelder and Horvath, 2008). The last  
96 strain, which is distantly related to *T. reesei* (Druzhinina et al., 2006) and represents a well-defined  
97 phylogenetic species (Dodd et al., 2003), was used to assess the differences across *Trichoderma*  
98 species. In addition, phylogenetic analyses of XYR1 and CRE1 protein sequences were performed to  
99 clarify the evolutionary relationships of these regulators among the evaluated strains.

100 In this study, we identified and compared modules, hub genes, and metabolic pathways associated  
101 with CRE1 and XYR1 under cellulose degradation conditions. To deeply investigate their regulatory  
102 activities, we also performed first neighbor and shortest-path network analyses. Although the  
103 evaluated *T. harzianum* strains are phylogenetically close, by comparing their coexpressed transcript  
104 profiles, functional diversity was observed. This difference was accentuated when associating the  
105 results of Th0179 and Th3844 with those of Ta0020. Thus, we observed a specific transcriptional  
106 pattern related to CRE1 and XYR1 in each strain. Our study could contribute to improving our  
107 understanding of the regulation of cellulose degradation in *T. harzianum* and paves the way for  
108 further studies evaluating differences across strains within the same species. Addressing these  
109 questions by investigating the genetic regulatory mechanisms involved in cellulose degradation is  
110 important for enhancing both our basic understanding and biotechnological industrial applications of  
111 fungal abilities.

## 112 2 Materials and methods

### 113 2.1 Fungal strains, culture conditions and transcription profiling

114 The species were obtained from the Brazilian Collection of Environment and Industry  
115 Microorganisms (CBMAI) located in the Chemical, Biological, and Agricultural Pluridisciplinary  
116 Research Center (CPQBA) of the University of Campinas (UNICAMP), Brazil. The identity of the  
117 *Trichoderma* isolates was authenticated by CBMAI based on phylogenetic studies of their internal  
118 transcribed spacer (ITS) region and translational elongation factor 1 (*tef1*) marker gene. The culture  
119 conditions and transcription profiling of the *T. harzianum* CBMAI-0179 (Th0179), *T. harzianum*  
120 IOC-3844 (Th3844), and *T. atroviride* CBMAI-0020 (Ta0020) strains are described in  
121 Supplementary Material 1.

## Degradation

### 122 2.2 Phylogenetic analyses

123 The ITS nucleotide sequences of *Trichoderma* spp. were retrieved from the NCBI database  
124 (<https://www.ncbi.nlm.nih.gov/>). Additionally, ITS nucleotide sequences amplified from the genomic  
125 DNA of Th3844, Th0179, and Ta0020 via PCR were kindly provided by the CBMAI and included in  
126 the phylogenetic analysis. The ITS region has been found to be among the markers with the highest  
127 probability of correctly identifying a very broad group of fungi (Schoch et al., 2012). *T. harzianum*  
128 T6776 was used as a reference genome to retrieve the CRE1 and XYR1 protein sequences belonging  
129 to *Trichoderma* spp. Additionally, the CRE1 and XYR1 sequences were obtained from the *T.*  
130 *harzianum* T6776 (Baroncelli et al., 2015) reference genome of Th3844 and Th0179 and the *T.*  
131 *atroviride* IMI206040 (Kubicek et al., 2011) genome of Ta0020 and used as references for the TF  
132 consensus sequences for RNA-Seq read mapping. These sequences were included in the phylogenetic  
133 analyses.

134 The multiple sequence alignment was performed using ClustalW (Thompson et al., 1994), and a  
135 phylogenetic tree was created using Molecular Evolutionary Genetics Analysis (MEGA) software  
136 v7.0 (Kumar et al., 2016). The maximum likelihood (ML) (Jones et al., 1992) method of inference  
137 was used based on a (I) Kimura two-parameter (K2P) model (Kimura, 1980), (II) Dayhoff model  
138 with freqs ( $F^+$ ), and (III) Jones-Taylor-Thornton (JTT) model for ITS, CRE1, and XYR1,  
139 respectively. We used 1,000 bootstrap replicates (Felsenstein, 1985) in each analysis. The trees were  
140 visualized and edited using Interactive Tree of Life (iTOL) v6 (<https://itol.embl.de/>).

### 141 2.3 Weighted gene coexpression network analysis

142 The gene coexpression networks of Th3844, Th0179, and Ta0020 were modeled using transcripts per  
143 million (TPM) value data of three biological replicates with the R (R Core Team, 2018) WGCNA  
144 package. Transcripts showing null values for most replicates under different experimental conditions  
145 were excluded. The network was assembled by calculating the Pearson's correlation coefficient of  
146 each pair of genes. A soft power  $\beta$  was chosen for each network using *pickSoftThreshold* to fit the  
147 signed network to a scale-free topology. Then, an adjacency matrix in which the nodes correspond to  
148 transcripts and the edges correspond to the strength of their connection was obtained. To obtain a  
149 dissimilarity matrix, we built a topological overlap matrix (TOM) as implemented in the package.

150 To identify groups of transcripts densely connected in the gene coexpression network, we applied  
151 simple hierarchical clustering to the dissimilarity matrix. From the acquired dendrogram, the  
152 *dynamicTreeCut* package (Langfelder et al., 2008) was used to obtain the ideal number of groups and  
153 the respective categorization of the transcripts. According to the functional annotation performed by  
154 Almeida et al. (2021), groups containing the desired TFs XYR1 and CRE1 were identified and  
155 named the *xyr1* and *cre1* groups, respectively.

### 156 2.4 Functional annotation of transcripts in the *xyr1* and *cre1* groups

157 We functionally annotated the transcripts in the *xyr1* and *cre1* groups. By conducting a Fisher's exact  
158 test to extract the overrepresented terms ( $p$ -value  $< 0.05$ ), all identified Gene Ontology (GO)  
159 (Ashburner et al., 2000) categories were used to identify enriched GO terms with the topGO package  
160 in R (Alexa and Rahnenfuhrer, 2021). To visualize the possible correlated enriched categories in the  
161 dataset caused by cellulose degradation, we created a treemap using the REVIGO tool (Supek et al.,  
162 2011). Then, the metabolic pathways related to the Kyoto Encyclopedia of Genes and Genomes  
163 (KEGG) (Kanehisa and Goto, 2000) Orthology (KO) identified in *T. reesei* were selected due the  
164 high number of annotations correlated with this species in the KEGG database. To identify the

## XYR1 and CRE1 Response to Cellulose

### Degradation

165 pathways related to the enzymes identified as belonging to different groups, we used the Python 3  
166 programming language (Sanner, 1999) along with the BioPython library (Cock et al., 2009). The  
167 automatic annotation was manually revised using the UniProt databases (UniProt Consortium, 2019).

### 168 2.5 Assessing the groups' network topologies

169 To provide a visual network characterization, we modeled additional gene coexpression networks of  
170 all strains using the highest reciprocal rank (HRR) approach (Mutwil et al., 2010). Using an R  
171 Pearson correlation coefficient threshold of 0.8, we assessed the 30 strongest edges, which were  
172 coded as  $\frac{1}{n}$  (top 10),  $\frac{1}{15}$  (top 20), and  $\frac{1}{30}$  (top 30). To visualize the behavior of the groups  
173 modeled by WGCNA in the HRR networks, we used Cytoscape software v3.7.0 (Shannon et al.,  
174 2003). Using the HRR methodology, we were able to infer the possible biological correlations  
175 depending on the network topology. First, by performing a topological analysis based on the degree  
176 distribution, we identified and compared the hub nodes in the *cre1* and *xyr1* groups among all  
177 evaluated strains. Second, to identify the more indirect associations of both TFs studied, we  
178 considered HRR global networks to evaluate the first neighbors of the *xyr1* and *cre1* transcripts.  
179 Finally, because XYR1 and CRE1 are described as regulatory proteins in CAZyme gene expression,  
180 we were also interested in evaluating the minimum pathway between these regulatory proteins and  
181 these hydrolytic enzymes. Based on the classification proposed by Almeida et al. (2021), we selected  
182 CAZymes with higher expression levels under cellulose growth conditions (upregulated transcripts)  
183 that were present in both Th0179 and Th3844. To obtain the corresponding homologs of Ta0020,  
184 BLASTp was performed using *T. atroviride* IMI206040 as the reference genome. The numbers of the  
185 shortest paths between both TFs, namely, CRE1 and XYR1, and the selected CAZymes were  
186 identified using the Pesca v. 3.0 plugin (Scardoni et al., 2016) in Cytoscape. The results were  
187 visualized using the R package pheatmap (Kolde, 2019).

## 188 3 Results

### 189 3.1 Molecular phylogeny of the evaluated *T. harzianum* strains

190 Although Kubicek et al. (2019) deeply investigated the phylogenetic relationships in the genus  
191 *Trichoderma*, no results were reported for Th3844, Th0179, and Ta0020. Here, we modeled a  
192 phylogenetic tree based on the ITS sequence of 14 *Trichoderma* spp., including those of our study  
193 strains (Supplementary Material 1: Supplementary Figure 1). According to the results, high genetic  
194 proximity between Th3844 and Th0179 was observed. In contrast, both strains were phylogenetically  
195 distant from Ta0020, which grouped with other *T. atroviride* strains. *Neurospora crassa* and  
196 *Fusarium oxysporum* were used as outgroups.

197 Additionally, to represent the evolutionary relationships of CRE1 and XYR1 among Th3844,  
198 Th0179, and Ta0020, a phylogenetic analysis was performed while considering their amino acid  
199 sequences (Figure 1). The phylogenetic trees were modeled based on 26 and 21 protein sequences  
200 related to CRE1 and XYR1, respectively, in the *Trichoderma* genus, including those of our studied  
201 strains. *Fusarium* spp. was used as an outgroup. The NCBI accession number of the sequences used  
202 to model the phylogenetic trees is available in Supplementary Material 2: Supplementary Table 2.

203 The CRE1 phylogenetic tree indicated a close genetic proximity between Th3844 and Th0179 (with  
204 bootstrap support of 67%) (Figure 1A). These results were supported by the alignment of both  
205 protein sequences, which showed high conservation in the alignment of their amino acid sequences  
206 (with a percent identity of 99.76%) (Supplementary Material 1: Supplementary Figure 2). In contrast,

## Degradation

207 the CRE1 protein sequence of Ta0020 shared closer affinity with two other *T. atroviride* strains (T23  
208 and IMI206040), with bootstrap support of 99% (Figure 1A). Furthermore, the C<sub>2</sub>H<sub>2</sub> domain is  
209 highly conserved in the Th3844, Th0179, and Ta0020 sequences of CRE1, with only one amino acid  
210 change from *T. atroviride* compared to both *T. harzianum* strains (Supplementary Material 1:  
211 Supplementary Figure 2).

212 In the XYR1 phylogenetic tree, Th3844, Th0179, and Ta0020 were closest to *T. harzianum* CBS  
213 226.95 (with bootstrap support of 97%), *T. harzianum* T6776 (with bootstrap support of 51%), and *T.*  
214 *atroviride* IMI206040 (with bootstrap support of 88%), respectively (Figure 1B). Compared to the  
215 results of CRE1, the alignment of their amino acid sequences showed a lower percentage of identity,  
216 supporting the phylogenetic results observed (Supplementary Material 1: Supplementary Figure 2).  
217 In addition, the multiple alignments of the XYR1 protein sequence of Th3844, Th0179, and Ta0020  
218 showed reasonable conservation of the Zn<sub>2</sub>Cys<sub>6</sub> and fungal-specific TF domains (Supplementary  
219 Material 1: Supplementary Figure 2).

### 220 3.2 Weighted gene coexpression network analysis

221 Recently, the transcriptomes of Th3844, Th0179, and Ta0020 grown on crystalline cellulose and  
222 glucose after a time course of 96 h were investigated (Almeida et al., 2021). By using these  
223 transcriptome data and applying the described filters in the WGCNA package, we obtained (I) 11,050  
224 transcripts (Th3844), (II) 11,105 transcripts (Th0179), and (III) 11,021 transcripts (Ta0020)  
225 (Supplementary Material 3: Supplementary Table 3). Based on these transcripts, we calculated  
226 Pearson's correlation matrices. Then, different soft power  $\beta$  values were chosen (48 for Th3844, 8 for  
227 Th0179, and 27 for Ta0020) to obtain the scale-free topology, reaching fit indexes of (I) 0.8 for  
228 Th3844 (mean connectivity of 40), (II) 0.9 for Th0179 (mean connectivity of 842), and (III) 0.85 for  
229 Ta0020 (mean connectivity of 406). Then, the networks were partitioned into manageable groups to  
230 explore the putative coregulatory relationships. In total, we identified 87 groups in Th3844, 75  
231 groups in Th0179, and 100 groups in Ta0020 (Supplementary Material 4: Supplementary Table 4).  
232 Transcripts with expression patterns correlated with XYR1 and CRE1 were identified in the Th3844,  
233 Th0179, and Ta0020 coexpression networks and grouped (described in Supplementary Material 5:  
234 Supplementary Table 5). Among the strains, Ta0020 presented the highest number of transcripts  
235 coexpressed with *cre1* and the lowest number of transcripts coexpressed with *xyr1*; the other strains  
236 showed the opposite profile.

### 237 3.3 Functional characterization of the transcripts in the *xyr1* and *cre1* groups

238 We performed an enrichment analysis of the transcripts in each *cre1* and *xyr1* group of all evaluated  
239 strains using the GO categories (Supplementary Material 1: Supplementary Figures 3-5,  
240 respectively). The *cre1* group of Th3844, Th0179, and Ta0020 presented 50, 38, and 50 enriched GO  
241 terms, respectively, while in the *xyr1* group, 34, 86, and 50 enriched GO terms were found in  
242 Th3844, Th0179, and Ta0020, respectively. Overall, the GO terms describing the transcripts of these  
243 groups were diverse across all strains, indicating a high degree of differences among the biological  
244 processes related to XYR1 and CRE1.

245 For example, the enrichment analyses of Ta0020 indicated that the carbohydrate metabolic process  
246 might be directly affected by CRE1 (high percentage of enriched GOs). Furthermore, GO terms  
247 related to fungal growth and nucleoside transmembrane transport were observed. In contrast, in  
248 Th0179 and Th3844, organic substance metabolic processes and regulation processes were  
249 pronounced, respectively. Interestingly, response to light stimulus was an enriched GO term in the  
250 *cre1* group of Th3844, and fungal-type cell wall organization was an enriched GO term in Th0179. In

## XYR1 and CRE1 Response to Cellulose

### Degradation

251 the XYR1 group, Ta0020 also presented carbohydrate metabolic process as an enriched GO term.  
252 However, few genes corresponding to this term were observed, while terms related to the regulation  
253 of DNA transcription were pronounced. Interestingly, response to external stimulus and oxidation-  
254 reduction process were notable terms in Th0179 and Th3844, respectively. Furthermore, our results  
255 suggest that the regulation of biological processes was a common enriched term in all the evaluated  
256 strains, with some particularities across the *T. harzianum* strains, including regulation of cell  
257 population proliferation (Th0179) and mRNA metabolic process (Th3844).

258 The KO functional annotation of the transcripts encoding enzymes and unknown proteins with  
259 enzymatic activity in the *cre1* and *xyr1* groups was also investigated. In the 14 pathway classes  
260 observed in each TF, 13 were shared between the two regulators (Figure 2). Only two pathway  
261 classes, i.e., metabolism of other amino acids and lipid metabolism, were exclusive to CRE1 and  
262 XYR1, respectively. However, the number of identified enzymes in a given pathway class differed in  
263 each strain. This difference stresses the diversity of proteins with several functions, which could  
264 result in exclusive enzymatic performance in cellulose degradation according to the strain.

265 Next, we summarize some important aspects of the identified metabolic pathways. For example,  
266 Ta0020 showed a greater number of enriched pathway classes in the *cre1* group, while both *T.*  
267 *harzianum* strains presented the opposite profile, with more enzymatic activity pathways enriched in  
268 the *xyr1* group. Carbohydrate metabolism was a pathway class enriched in both *T. harzianum* strains  
269 in the *xyr1* group, while Th0179 and Ta0020 presented such a profile in the *cre1* group. In the *xyr1*  
270 group, nucleotide metabolism and metabolism of cofactors and vitamins were enriched terms in  
271 Th0179, while xenobiotic degradation and metabolism of terpenoids and polyketides were enriched  
272 terms exclusively in Ta0020. The pathway classes related to secondary metabolite compounds were  
273 also enriched in all evaluated strains in the *cre1* and *xyr1* groups, and Ta0020 presented the highest  
274 number of enzymes related to this term in the *cre1* group.

275 In this study, network analyses were conducted to investigate how the molecular basis of XYR1 and  
276 CRE1 for cellulose-degrading enzyme production varies among *T. harzianum* strains. Thus, after  
277 analyzing the functional composition of the transcripts in the *cre1* and *xyr1* groups of all evaluated  
278 strains, particular attention was given to CAZymes, TFs, and transporters (Figure 3). We observed  
279 that in the *cre1* group, Ta0020 showed the highest number of transcripts encoding CAZymes, TFs,  
280 and transporters, while in the *xyr1* group, both *T. harzianum* strains presented a great number of  
281 coexpressed transcripts encoding TFs, followed by those encoding transporters. Furthermore, Th3844  
282 showed a high number of CAZymes in the *xyr1* group.

283 We identified the main CAZyme classes, including glycoside hydrolases (GHs), carbohydrate  
284 esterases (CEs), glycosyltransferases (GTs), and polysaccharide lyases (PLs), coexpressed with *xyr1*  
285 and *cre1* transcripts. To determine the similarities and differences across the strains, their CAZyme  
286 profiles were compared (Figure 4). In the *xyr1* and *cre1* groups, the GH family, which encompasses  
287 enzymes that hydrolyze glycosidic bonds, was identified in all the evaluated strains with different  
288 numbers of transcripts (Figure 4A and B). In the *cre1* group, Ta0020 presented the highest number of  
289 classified transcripts of the GH family, followed by Th0179 and Th3844. In the *xyr1* group, Th3844  
290 presented a higher number of GHs than Th0179 and Ta0020. Furthermore, transcripts encoding CEs,  
291 which hydrolyze ester bonds, were associated with the *cre1* transcript in Ta0020 and Th0179,  
292 whereas transcripts of the PL family, which cleave bonds in uronic acid-containing polysaccharide  
293 chains, were coexpressed with the *xyr1* transcript in only Th3844. In addition, transcripts of the GT  
294 family, which synthesizes glycosidic bonds from phosphate-activated sugar donors, were present in

## Degradation

295 the *cre1* group of Th0179 and the *xyl1* groups of Th3844 and Ta0020. We also investigated the  
296 quantification of each CAZyme family in the *cre1* and *xyl1* groups of all evaluated strains (Figure 4C  
297 and D). Overall, Ta0020 presented a high number of GHs belonging to family 18, coexpressed with  
298 the *cre1* transcript, while Th0179 exhibited a significant amount of GT90 (Figure 4C). Different  
299 CAZyme profiles were observed in the *xyl1* groups, and Th3844 showed the highest diversity of  
300 CAZyme families (Figure 4D).

301 Several positive and negative regulators are involved in the expression of CAZyme-coding genes and  
302 other proteins required for lignocellulose breakdown. Thus, we sought to identify transcripts  
303 encoding TFs coexpressed in the *cre1* and *xyl1* groups (Figure 5). In both groups, transcripts  
304 encoding Zn<sub>2</sub>Cys<sub>6</sub>-type TFs were identified in all the evaluated strains with different numbers of  
305 transcripts. In the *cre1* group of Ta0020, the number was higher than that observed in Th0179 and  
306 Th3844 (Figure 5A), while in the *xyl1* group, we observed the opposite profile (Figure 5B). Most  
307 Zn<sub>2</sub>Cys<sub>6</sub> proteins also contain a fungal-specific TF domain, which was coexpressed with both *cre1*  
308 and *xyl1* transcripts in Th3844 and Ta0020. In this last strain, a C6 zinc finger domain TF was  
309 coexpressed with *xyl1*. Transcripts encoding C<sub>2</sub>H<sub>2</sub>-type TFs were identified in Ta0020 and *T.*  
310 *harzianum* strains in the *cre1* and *xyl1* groups, respectively. Furthermore, in the *xyl1* group, we  
311 found a transcript encoding the SteA regulator, which is involved in the regulation of fungal  
312 development and pathogenicity (Hoi and Dumas, 2010), in Th0179.

313 Transporters are also important players in the degradation of plant biomass. Here, transcripts  
314 encoding transport proteins coexpressed with *cre1* and *xyl1* were selected (Figure 6). Among them,  
315 transcripts encoding major facilitator superfamily (MFS) transport proteins were coexpressed with  
316 *cre1* in Th0179 and Ta0020 (Figure 6A) and *xyl1* in Th0179 and Th3844 (Figure 6B). Amino acid  
317 transporters were present in the *xyl1* groups of all strains and the *cre1* group only of Th0179.  
318 Transcripts encoding the ATP-binding cassette (ABC) were coexpressed with *xyl1* only in Th3844.  
319 Th0179 showed transcripts encoding several types of transporters coexpressed with *xyl1*, e.g., vesicle  
320 transporter SEC22, cation transporting ATPase, and calcium-dependent mitochondrial carrier, while  
321 Ta0020 coexpressed with *cre1*, e.g., UDP-galactose transporter and CNT. Transcripts encoding ion  
322 transporters were present in both the *cre1* and *xyl1* groups of Ta0020 and Th0179. In the *cre1* group,  
323 such transcripts included zinc and magnesium transporter proteins in Ta0020 and potassium  
324 transporter proteins in Th0179. In the *xyl1* group, such transcripts include Cd<sup>2+</sup>Zn<sup>2+</sup> transporters in  
325 Ta0020 and Ca<sup>2+</sup> transporters in Th0179. Th0179 and Th3844 also present a G protein coexpressed  
326 with the *cre1* transcript.

327 To better understand the regulation mediated by the studied TFs in the evaluated *T. harzianum*  
328 strains, we also investigated other classes of proteins coexpressed with the *cre1* and *xyl1* transcripts.  
329 For example, phosphatases, kinases and TFs are key components in cellular signaling networks.  
330 Transcripts encoding kinase proteins were coexpressed with *cre1* transcripts in Ta0020 and Th3844  
331 and *xyl1* transcripts in Ta0020 and Th0179. In addition, all strains showed transcripts encoding  
332 phosphatases coexpressed with *cre1*, and in Th0179 and Th3844, such transcripts were coexpressed  
333 with *xyl1*. In addition, transcripts encoding cytochrome P450 genes, which constitute an important  
334 group of enzymes involved in xenobiotic degradation and metabolism, were found in the *cre1* groups  
335 of all the evaluated strains.

336 Furthermore, different quantities of differentially expressed transcripts were found in Ta0020 (78)  
337 and Th0179 (6) (described in Supplementary Material 6: Supplementary Table 6 and Supplementary  
338 Material 1: Supplementary Table 7). In Ta0020, most upregulated transcripts under cellulose growth  
339 (70) were associated with the *cre1* group, including *cre1*, whereas *xyl1* demonstrated a potentially



## XYR1 and CRE1 Response to Cellulose

### Degradation

340 significant expression level under glucose growth. In Th3844, *cre1* significantly modulated the  
341 expression of the two carbon sources, with a high expression level under glucose growth. Even with  
342 the reduced differentiation observed (-1.13), this phenomenon was considered in other studies  
343 (Antonieto et al., 2014; Castro et al., 2016). In Th0179, *xyr1* and *cre1* revealed a low modulation in  
344 transcript expression between growth under cellulose or glucose. However, *xyr1* had a higher  
345 transcript expression level under glucose than *cre1*, which had a higher transcript expression level  
346 under cellulose growth conditions. In Th3844, *xyr1* exhibited similar results.

### 347 3.4 Assessing the groups' network topologies

348 To identify the main aspects of the network topologies, we applied the HRR methodology to the  
349 transcriptome data, which were also used to model the networks using the WGCNA methodology  
350 (Figure 7).

351 In the CRE1 and XYR1 subnetworks, different connection profiles were observed in each strain  
352 (Figure 8). While the transcripts in the *cre1* groups showed less ranked connections in the WGCNA  
353 groups of the *T. harzianum* strains (Figure 8A and B), Ta0020 showed the opposite profile. In this  
354 strain, the transcripts in the *cre1* group were more strongly connected (Figure 8C). In contrast, in the  
355 *xyr1* groups, the transcripts were more densely connected in the *T. harzianum* strains (Figure 8D and  
356 E), while in Ta0020, the transcripts were separated.

357 Transcripts at the top of the degree distribution, which are defined here as hubs, are topologically  
358 important to the network structure and are often functionally relevant (Luscombe et al., 2004). Thus,  
359 the hub nodes were sought in the *cre1* and *xyr1* groups. In the *cre1* groups, transcripts encoding a  
360 SET-domain protein, an ATP synthase, and a transcript not yet annotated were hub nodes of Th3844,  
361 Th0179, and Ta0020, respectively. In Ta0020, we found that such an uncharacterized transcript had a  
362 degree value equal to 52, which differs from the *T. harzianum* strains in which the hub nodes had  
363 degree values of 4 (Th3844) and 9 (Th0179) (Supplementary Material 7: Supplementary Table 8). In  
364 the *xyr1* groups, transcripts encoding an ATP-dependent RNA helicase, a cytokinesis *sepA*, and  
365 hypothetical proteins were found as hub nodes of Th3844, Th0179, and Ta0020, respectively  
366 (Supplementary Material 7: Supplementary Table 8). Here, we show that the hub nodes in the *cre1*  
367 group of Ta0020 had a degree value of 1 and all encoded hypothetical proteins, while in the *T.*  
368 *harzianum* strains, the hub nodes had degree values of 13 (Th3844) and 7 (Th0179). Among the other  
369 transcripts with a degree value lower than that of those at the top of the degree distribution, in the  
370 *xyr1* group, GH76 and Zn<sub>2</sub>Cys<sub>6</sub>-type TFs (degree value of 6) were identified as candidate hub genes  
371 of Th0179, while regulator-nonsense transcripts (degree value of 9) and Zn<sub>2</sub>Cys<sub>6</sub>-type TFs (degree  
372 value of 8) were identified as candidate hub genes of Th3844. In the *cre1* group, the proteasome  
373 component PRE3 (degree value of 2) in Th3844 was found as a hub node, and replication factor C  
374 and phosphoglucomutase (degree value of 5) were found in Th0179. In addition, in Ta0020, we  
375 identified calcium calmodulin-dependent kinase (degree value of 9) and GH93 (degree value of 8) as  
376 hub nodes.

377 In all evaluated strains, as a reduced number of differentially expressed transcripts was found in the  
378 *cre1* and *xyr1* groups, we expanded our investigation of the studied groups by selecting the first  
379 neighbors of XYR1 and CRE1 in global HRR networks. Different quantities of *cre1* neighbors were  
380 found in Th3844 (59), Th0179 (21), and Ta0020 (25), and different quantities of *xyr1* were found in  
381 Th3844 (46), Th0179 (59), and Ta0020 (70) (described in Supplementary Material 8: Supplementary  
382 Table 9). Regarding the *cre1* neighbors, these transcripts were distributed among 24 groups in

## Degradation

383 Th3844, 15 groups in Th0179, and 16 groups in Ta0020. In contrast, considering the *xyr1* neighbors,  
384 such transcripts were distributed among 19 groups in Th3844, 32 groups in Th0179, and 42 groups in  
385 Ta0020. The direct coexpressed neighbors of *xyr1* included downregulated transcripts in Th3844 (4),  
386 Th0179 (5), and Ta0020 (22) and upregulated transcripts in Th3844 (1), Th0179 (1), and Ta0020 (1).  
387 Interestingly, only Ta0020 showed differentially expressed transcripts as the first neighbor of the  
388 *cre1* transcript (4 downregulated and 4 upregulated). Overall, these differentially expressed  
389 transcripts included transporters, CAZymes, kinases, and other proteins related to the regulation  
390 process.

391 For simplification, only a few neighboring transcripts of *xyr1* and *cre1* in Th3844, Th0179, and  
392 Ta0020 are shown in Tables 1-3, respectively. In Th3844, TFs, transporters, a cytochrome, and a  
393 phosphatase were found to be first neighbors of the *cre1* transcript, while TFs, transporters, and  
394 CAZymes were found to be the first neighbors of the *xyr1* transcript. In Th0179, several types of  
395 proteins, including a kinase, were found to be first neighbors of *cre1*, while transporters, CAZymes,  
396 and a TF were found to be first neighbors of the *xyr1* transcript. In Ta0020, several types of proteins,  
397 including kinases, were found to be first neighbors of *cre1*, while transporters, CAZymes, TFs, and a  
398 DNA ligase were found to be first neighbors of the *xyr1* transcript. Hypothetical proteins were also  
399 found to be neighbors of the *cre1* and *xyr1* transcripts of all strains, indicating that both regulators  
400 might have a regulatory influence on uncharacterized proteins.

401 We also applied a shortest-path network analysis to identify possible transcripts outside of the *xyr1*  
402 and *cre1* groups that may be influenced by CRE1 and XYR1 (described in Supplementary Material  
403 9: Supplementary Table 10). As the shortest path, we considered the minimal number of edges that  
404 need to be traversed from a node to reach another node (Koutrouli et al., 2020). As both regulators  
405 act on the gene expression of hydrolytic enzymes related to plant biomass degradation, we sought to  
406 determine the number of shortest paths from XYR1 and CRE1 to the selected CAZymes. In all  
407 evaluated strains and both TFs, we found a similar quantity of shortest paths (Figure 9A and  
408 Supplementary Material 1: Supplementary Figures 6 and 7). However, some aspects should be noted.  
409 For example, Th0179 presented transcripts encoding CAZymes from the GH1, GH5, and GH6  
410 families, which are more distantly related to CRE1, while Ta0020 showed only a CAZyme from the  
411 GH6 family satisfying this requirement. In Th3844, we found a transcript encoding a CAZyme from  
412 GH3 strongly related to XYR1, and CAZymes with the CBM1 domain were also closely connected  
413 with such a regulator. In Th0179, a CAZyme from GH55 exhibited a close relationship with XYR1,  
414 while in Ta0020, CAZymes from the GH7, GH72, and GH1 families and the CBM1 domain also  
415 presented such a profile. In addition, given a determined shortest path, we also considered the  
416 number of possibilities that may have occurred (Figure 9B and Supplementary Material 1:  
417 Supplementary Figure 6 and 7). Across all strains and in both TFs, significant differences were  
418 observed in the number of chances. For instance, a significant number of possible minimum paths  
419 between CRE1 and a CAZyme from the GH6 family were observed in Ta0020, likely suggesting a  
420 strong influence of this repressor regulator on enzyme activity. Similarly, CAZymes from the AA9  
421 and GH16 families appeared to be affected by XYR1. In Th0179, CAZymes from GH10, GH6, and  
422 GH1 presented a higher number of possible shortest paths related to CRE1, potentially indicating an  
423 impact of this TF on these enzyme activities.

424 We also performed a shortest-path analysis to identify transitive transcripts between *cre1* or *xyr1* and  
425 the selected CAZymes, which allowed us to discover new transcripts that may be involved in the  
426 same biological process. For simplification, we only chose a few shortest paths to explore such  
427 transitive transcripts. In Th3844, NADH:ubiquinone oxidoreductase (THAR02\_08259), which is the  
428 largest multiprotein complex of the mitochondrial respiratory chain (Whitehouse et al., 2019), was

## XYR1 and CRE1 Response to Cellulose

### Degradation

429 found between GH45 with a CBM1 domain (THAR02\_02979) and *cre1*. We also found another  
430 transcript involved in ATP synthesis, NAD(P) transhydrogenase beta subunit (THAR02\_08260),  
431 between GH1 (THAR02\_05432) and *cre1*. Furthermore, a transcript encoding a component of the  
432 endoplasmic reticulum quality control system called ER-associated degradation (THAR02\_08220)  
433 (Phillips et al., 2020) was found between GH16 (THAR02\_03302) and *cre1*. Interestingly, in  
434 Ta0020, a phosphotyrosine phosphatase was found in the shortest path between GH1  
435 (TRIATDRAFT\_135426), which is a homolog of GH1 (THAR02\_05432) in *T. harzianum* strains,  
436 and *cre1*. This phosphatase is involved in protein phosphorylation, which is a key posttranslational  
437 modification critical for the control of many cellular functions (Nasa and Kettenbach, 2018). In  
438 Th3844, we found a transcript encoding a mitochondrial outer membrane porin (THAR02\_07078)  
439 between CBM1 (THAR02\_02133) and *xyl1*. These protein transporters transport small molecules  
440 and play significant roles in diverse cellular processes, including the regulation of mitochondrial ATP  
441 and calcium flux (Grevel and Becker, 2020). In Ta0020, methyltransferase domain-containing  
442 (TRIATDRAFT\_292180), which is important for the regulation of chromatin and gene expression  
443 (Kouzarides, 2007), was found between GH1 (TRIATDRAFT\_150220) and *xyl1*.

### 4 Discussion

445 Although the importance of XYR1 and CRE1 in the expression of CAZyme-encoding genes and  
446 other proteins required for lignocellulose degradation is evident, the transcriptional regulation  
447 mediated by both proteins in *T. harzianum* strains remains poorly explored (Delabona et al., 2017,  
448 2021). A previous study demonstrated that some genes encoding regulatory proteins, such as *xyl1*,  
449 evolved by vertical gene transfer in *Trichoderma* spp. (Druzhinina et al., 2018). Here, we inferred the  
450 evolutionary relationships of XYR1 and CRE1 in the evaluated strains. In both regulatory proteins, a  
451 great genetic distance was observed between the amino acid sequences of Ta0020 and those of  
452 Th3844 and Th0179. These findings supported the genetic tree of the evaluated species in which  
453 Ta0020 was grouped with other *T. atroviride* strains. However, among the *T. harzianum* strains, we  
454 noted that the CRE1 amino acid sequences were more highly conserved than those of XYR1. These  
455 results are consistent with previous studies reporting that while the function of CRE1 is conserved  
456 throughout the fungal kingdom (Adnan et al., 2017), the role of XYR1 greatly differs across  
457 ascomycete fungi (Klaubauf et al., 2014).

458 Recently, different types of enzymatic profiles across *Trichoderma* species were reported, and  
459 Th3844 and Th0179, which have hydrolytic potential, have higher cellulase activity during growth  
460 on cellulose than Ta0020 (Almeida et al., 2021). Because such diversity in enzyme response might be  
461 affected by the specific functionalities of regulatory proteins and evolutionary divergence between  
462 XYR1 and CRE1 has been reported (Klaubauf et al., 2014; Benocci et al., 2017), we aimed to  
463 investigate how both TFs could affect transcripts' activities in response to cellulose degradation in *T.*  
464 *harzianum* strains. Therefore, the networks of Th3844, Th0179, and Ta0020 were modeled, and the  
465 last strain was used to assess the differences across *Trichoderma* species. In the evaluated *T.*  
466 *harzianum* strains, these networks can facilitate the interpretation of relevant relationships among  
467 sets of transcripts related to the TFs CRE1 and XYR1, providing insight into the regulatory  
468 relationships of hydrolysis in these fungi. Such applications are possible because transcripts sharing  
469 the same function or involved in the same regulatory pathway tend to present similar expression  
470 profiles and, hence, form modules in the network (Wolfe et al., 2005). In fungi, such methodology  
471 has been successfully used to provide insight into the regulatory mechanisms of hydrolysis (Borin et  
472 al., 2018; Arntzen et al., 2020; Li et al., 2020a).

## Degradation

473 We observed that each network had a different configuration with distinct module profiles of XYR1  
474 and CRE1, providing insight into how these TFs might act in specific ways in different *Trichoderma*  
475 species. These functional differences in the *xyr1* and *cre1* groups can be attributed to previously  
476 reported differences in the regulatory mechanisms of hydrolysis (Almeida et al., 2021). By analyzing  
477 both groups, we observed that more transcripts were coexpressed with XYR1 in the *T. harzianum*  
478 strains than *T. atroviride*, which had more transcripts coexpressed with CRE1. However, although  
479 the phylogenetic similarity between the evaluated *T. harzianum* strains shows that they share a  
480 largely common genetic background, their profiles of transcripts coexpressed with *xyr1* and *cre1*  
481 differed.

### 482 **4.1 Insight into the genetic impacts of XYR1 and CRE1**

483 To obtain insight into the functional profile of the *cre1* and *xyr1* groups, GO enrichment analyses of  
484 transcripts from these groups of all evaluated strains were performed. Here, response to external  
485 stimulus was a notable GO term in Th0179 in the *xyr1* group, suggesting that the transcripts of these  
486 group likely respond to external environmental conditions, such as carbon sources. Furthermore,  
487 interconnections between nutrient and light signaling pathways have been reported in filamentous  
488 fungi, such as *N. crassa* and *T. reesei*, with substantial regulation by photoreceptors (Schmoll, 2018).  
489 More interestingly, the influence of light on CRE1 functions has been reported (Monroy et al., 2017),  
490 supporting our findings showing that the response to a light stimulus was an enriched GO term in the  
491 *cre1* group of Th3844. In contrast, the enrichment analysis of Ta0020 indicates that the activity of  
492 CRE1 may be stronger in such fungi, directly repressing genes related to plant cell wall-degrading  
493 enzymes, which was not observed in the *T. harzianum* strains. In these strains, organic substance  
494 metabolic processes (Th3844) and regulation processes (Th0179) were enriched GO terms. In  
495 addition, fungal-type cell wall organization was an enriched term of Th0179 in the *cre1* group.  
496 Previously, the important functions of CRE1 in fungal growth were reported in filamentous fungi,  
497 supporting our results (Portnoy et al., 2011; Mello-de-Sousa et al., 2014).

498 By investigating the KO functional annotation of the *cre1* and *xyr1* groups, we suggest that both  
499 regulators act on the same enzymatic pathways, which was expected due to antagonism in their  
500 function, i.e., while CRE1 is the main repressor of genes encoding proteins related to lignocellulose  
501 degradation, XYR1 is the main activator of such genes. However, each triggers a specific metabolic  
502 pathway according to the strain; therefore, some aspects are noteworthy. For example, it has been  
503 reported that the *Trichoderma* species display several mechanisms during their antagonistic action  
504 against plant pathogens, including the production of secondary metabolites (Malmierca et al., 2015).  
505 According to our findings, due to the highest number of pathways related to secondary metabolites,  
506 including the metabolism of terpenoids and polyketides (Mukherjee et al., 2008), we suggest that  
507 CRE1 and XYR1 participate in the regulation of secondary metabolism compounds in *T. atroviride*.  
508 Furthermore, XYR1 in *T. harzianum* strains appeared to be deeply connected with enzyme pathways  
509 related to the metabolism of carbohydrates, especially in the Th3844 strain.

510 Through a network analysis, we identified transcripts encoding CAZymes coexpressed with *xyr1* and  
511 *cre1* in all evaluated strains. We identified CAZyme families responsible for cellulose degradation  
512 (e.g., GH12); hemicellulose degradation (e.g., GH16, GH17, CE1, and CE5); pectin degradation  
513 (e.g., GH28 and GH93); and other CAZY families with multiple activities or minor activities on  
514 lignocellulosic substrates, such as GH2, GH5, GH43, GH95, GH30, and GH39 (de Vries et al., 2017;  
515 Kameshwar et al., 2019). Although Ta0020 presented the highest number of GHs coexpressed with  
516 CRE1, it was found to be less efficient than the other *Trichoderma* strains in degrading plant biomass  
517 (Almeida et al., 2021). In the GH class, enzymes belonging to the GH18 family, which is mainly

## XYR1 and CRE1 Response to Cellulose

### Degradation

518 represented by chitinase-like proteins, are directly related to fungal cell wall degradation in  
519 mycoparasite species of *Trichoderma* (Gruber and Seidl-Seiboth, 2012). Four GH18 enzymes were  
520 coexpressed with CRE1 in *T. atroviride*, which is widely used as a biocontrol agent in agriculture.  
521 However, in Ta0020, enzymes from the GH75 family of chitosanases were coexpressed with *xyl1*.  
522 Therefore, the degradation of chitosan, which is a partially deacetylated derivative of chitin (Hahn et  
523 al., 2020), is a relevant aspect of mycoparasitism that may be influenced by the activity of XYR1.  
524 Recently, transcripts encoding GHs were found to be coexpressed with some TFs involved in  
525 biomass degradation, e.g., XYR1 (Borin et al., 2018). In the present study, the transcripts encoding  
526 hydrolytic enzymes could be sorted into other groups formed in the networks mainly because their  
527 expression patterns differed from those of the *xyl1* and *cre1* transcripts.

528 Several fungal TFs have been described to be directly involved in the regulation of plant biomass  
529 utilization (Benocci et al., 2017). Most TFs belong to the zinc cluster family, including Zn<sub>2</sub>Cys<sub>6</sub>- and  
530 C<sub>2</sub>H<sub>2</sub>-type TFs, which are characterized by the presence of zinc finger(s) in their binding domains.  
531 Most positive regulators appear to belong to the Zn<sub>2</sub>Cys<sub>6</sub> class, while repressors belong to the C<sub>2</sub>H<sub>2</sub>  
532 class (Benocci et al., 2017). Here, we found the highest number of transcripts encoding the Zn<sub>2</sub>Cys<sub>6</sub>  
533 and C<sub>2</sub>H<sub>2</sub> classes in the *xyl1* and *cre1* groups of Th0179 and Ta0020, respectively. Both *T. harzianum*  
534 strains had a similar profile of transcripts coexpressed with CRE1 and XYR1. However, SteA, a  
535 C<sub>2</sub>H<sub>2</sub>-type TF, was coexpressed with the *xyl1* transcript of Th0179. This regulator has been described  
536 as an important player in fungal environmental adaptation in response to nutrient deprivation, the  
537 production of extracellular proteins involved in the degradation of complex substrates (Hoi and  
538 Dumas, 2010), and the mediation of the regulatory role of mitogen-activated protein kinase (MAPK)  
539 during mycoparasitic responses (Gruber and Zeilinger, 2014). In *Aspergillus nidulans*, SteA is  
540 required for sexual development (Vallim et al., 2000).

541 During plant biomass degradation, fungi secrete extracellular enzymes to decompose polysaccharides  
542 into small molecules, which are then imported into cells through transporters (Sloothaak et al., 2016).  
543 One of the most relevant sugar transporter families in filamentous fungi is the MFS family (Zhang et  
544 al., 2013). Here, we found the highest number of transcripts encoding MFS coexpressed with *cre1*  
545 and *xyl1* in Ta0020 and Th3844, respectively. Among the *T. harzianum* strains, compared with  
546 Th3844, Th0179 showed transcripts encoding several types of transporter proteins, such as  
547 transporter proteins of calcium ions (THAR02\_04202, THAR02\_03989, and THAR02\_01350). It has  
548 already been reported that metal ions, such as Ca<sup>2+</sup>, have a positive effect on the mycelial growth of  
549 *T. reesei* and cellulase production (Chen et al., 2016). This molecular signaling mechanism is  
550 mediated by cations transporting ATPase and calcium-dependent mitochondrial carriers, which are  
551 both components of Ca<sup>2+</sup>/calmodulin signal transduction, including the TF Crz1 (Chen et al., 2016;  
552 Martins-Santana et al., 2020). Therefore, investigating the role of proteins related to calcium  
553 transporters in the induction of genes responsive to lignocellulose degradation in Th0179 cells is  
554 important since these proteins could transport cations that activate gene expression. Furthermore,  
555 transcripts encoding G proteins were coexpressed with *cre1* in Th0179 and Ta0020. Heterotrimeric G  
556 proteins have been well studied in several *Trichoderma* species. In saprophytic species, such proteins  
557 are involved in the nutrient signaling pathway in connection with a light response, triggering the  
558 posttranscriptional regulation of cellulase expression (Hinterdobler et al., 2021); in mycoparasitic  
559 species, G protein-coupled receptors are involved in the regulation of processes related to  
560 mycoparasitism (Zeilinger and Atanasova, 2020).

561 Although CAZymes, TFs, and transporters play an important role in cellulose degradation, these  
562 types of proteins represented only a small percent of the transcripts coexpressed with XYR1 and

## Degradation

563 CRE1 compared to the other protein classes as follows: in the *cre1* group, (I) 10.4% (Th0179), (II)  
564 5.7% (Th3844), and (III) 17.9% (Ta0020), and in the *xyr1* group, (IV) 11.8% (Th0179), (V) 11.9%  
565 (Th3844), and (VI) 16% (Ta0020). Since the regulation of genes involved in biomass breakdown is a  
566 complex process that involves several signaling pathways, we expected to find proteins with a great  
567 range of functions coexpressed with *xyr1* and *cre1*. For example, various kinases and phosphatases  
568 were coexpressed with *xyr1* and *cre1* in all evaluated strains. It has been reported that cellulase gene  
569 expression can be regulated by the dynamics of protein phosphorylation and dephosphorylation,  
570 which involve protein kinases and phosphatases, respectively (Schmoll et al., 2016). Furthermore, in  
571 filamentous fungi, phosphorylation is a prerequisite for CRE1 activity (Cziferszky et al., 2002; Han  
572 et al., 2020; de Assis et al., 2021). Therefore, in *T. harzianum*, it is important to elucidate the role of  
573 kinases and phosphatases in the regulation of CRE1 function. In all evaluated strains, cytochrome  
574 P450 coding genes represented another class of proteins coexpressed in the *cre1* group. It has been  
575 reported that these enzymes are important for cells to perform a wide variety of functions, including  
576 primary and secondary metabolism, xenobiotic degradation, and cellular defense against plant  
577 pathogenic fungi (Siewers et al., 2005; Fan et al., 2013; Chadha et al., 2018). To expand previous  
578 findings concerning *Trichoderma* spp. (Chadha et al., 2018), their similar expression pattern with the  
579 *cre1* transcript makes them important candidates for an extensive investigation in the cellulose  
580 degradation context.

581 We also investigated the expression profiles of the transcripts in the *cre1* and *xyr1* groups, including  
582 *xyr1* and *cre1*, under cellulose and glucose growth. Castro et al. (2016) reported that in *T. reesei*, the  
583 expression level of *xyr1* was minimal in the presence of glucose; this phenomenon was not observed  
584 in Ta0020 in the present study. In addition, in Ta0020, *cre1* was upregulated in the presence of  
585 cellulose, which was not expected due to the role of CRE1 in the repression of cellulolytic and  
586 hemicellulolytic enzymes when an easily metabolizable sugar, i.e., glucose, is available in the  
587 environment (Benocci et al., 2017). In contrast, in Th3844, the *cre1* expression level in the presence  
588 of glucose was higher than that in the presence of cellulose. The gene coexpression networks were  
589 modeled based on the transcript expression level under two sets of conditions (cellulose and glucose).  
590 Considering that the expression of the *cre1* transcript in Ta0020 was upregulated under cellulose  
591 growth, upregulated transcripts were expected and found in the *cre1* group. Recently, Almeida et al.  
592 (Almeida et al., 2021) reported that Ta0020 presented the highest number of differentially expressed  
593 transcripts under cellulose growth conditions relative to glucose, followed by Th3844 and Th0179.  
594 Here, the quantity of upregulated transcripts was low in the *cre1* and *xyr1* groups of the *T. harzianum*  
595 strains. These results may indicate that both TFs have a basal expression level at 96 h of  
596 fermentation; thus, the transcripts grouped with such regulatory proteins presented the same  
597 expression pattern and, mostly, were not differentially expressed transcripts.

## 598 4.2 Examining the network's topology

599 To extract additional information from the networks, we characterized the network topologies of the  
600 modules identified separately. Therefore, we coupled the results obtained using the WGCNA  
601 methodology with those obtained using the HRR approach by applying the topological network  
602 properties. From the network topology analysis, we might infer that many transcripts were under the  
603 influence of the repressor CRE1 in Ta0020, while in the *T. harzianum* strains, the transcripts seem to  
604 have been affected by the activator XYR1. Therefore, the described profiles may indicate that in *T.*  
605 *harzianum*, the transcripts, including those encoding XYR1, act together to perform a determined  
606 biological function that is favorable to the expression of genes related to cellulose degradation. In  
607 contrast, in *T. atroviride*, the transcripts in the *cre1* group appeared to act on the same biological

## XYR1 and CRE1 Response to Cellulose

### Degradation

608 process, which may be related to the repression of genes encoding hydrolytic enzymes and other  
609 proteins required for cellulose degradation.

610 Hub transcripts were identified in the *cre1* and *xyl1* groups, and new targets were discovered. In the  
611 *cre1* group, a transcript with a SET-domain coding gene was found as a hub node of Th3844. Such  
612 SET-domain proteins participate in chromatin modifications by methylating specific lysines on the  
613 histone tails (Kouzarides, 2007). In filamentous fungi, the epigenetic regulation of holocellulase gene  
614 expression has already been reported (Zeilinger et al., 2003), and CRE1 plays an important role in  
615 nucleosome positioning (Ries et al., 2014). Interestingly, ATP synthase, which synthesizes ATP from  
616 ADP and inorganic phosphate on mitochondria (Burger et al., 2003), was found to be a hub node of  
617 Th0179. Thus, we might infer that a great number of transcripts were coexpressed with a hub node  
618 related to mitochondrial ATP production, which is the main energy source for intracellular metabolic  
619 pathways (Neupane et al., 2019). In the *xyl1* group, a transcript encoding an ATP-dependent RNA  
620 helicase was found as a hub node of Th3844. Such enzymes catalyze the ATP-dependent separation  
621 of double-stranded RNA and participate in nearly all aspects of RNA metabolism (Jankowsky, 2011).  
622 Additionally, the *sepA* transcript was identified as a hub node of Th0179. In *Aspergillus nidulans*, the  
623 *sepA* gene encodes a member of the FH1/2 protein family, which is involved in cytokinesis and the  
624 maintenance of cellular polarity, i.e., related to the cell division process (Harris et al., 1997). Overall,  
625 our findings suggest that the hub genes were not necessarily the most effective genes related to  
626 lignocellulose deconstruction, confirming the indirect action of XYR1 and CRE1 in *T. harzianum* on  
627 regulatory hydrolysis mechanisms. In Ta0020, transcripts encoding hypothetical proteins were  
628 identified as potential hub nodes in both groups, providing new targets for further studies evaluating  
629 their functions in fungal physiology.

630 We also investigated the first neighbors of the *cre1* and *xyl1* transcripts in the modeled global HRR  
631 networks of all evaluated strains. While Ta0020 showed differentially expressed transcripts as the  
632 first neighbor of the *cre1* transcript, interestingly, both *T. harzianum* strains presented the opposite  
633 profile in which only the first neighbors of the *xyl1* transcript were differentially expressed. In  
634 addition, the evaluated strains showed different numbers of neighbors of the *cre1* and *xyl1*  
635 transcripts, which were distributed among several groups. Such a divergent profile may indicate that  
636 each TF affects a set of transcripts in a specific way that varies among the strains. Overall, we  
637 identified CAZymes, TFs, and transporters as first neighbors of *cre1* and *xyl1*, confirming the results  
638 obtained in this study using the WGCNA approach.

639 Another property of a network's topology is the shortest paths connecting two transcripts  
640 (Pavlopoulos et al., 2011). Here, the significant shortest paths between both studied TFs, i.e., CRE1  
641 and XYR1, and the CAZymes with a higher-level expression under cellulose growth conditions were  
642 investigated in all strains. The average shortest pathway distance between the transcripts encoding  
643 CRE1 or XYR1 and all selected CAZymes was relatively short, which may be attributed to a network  
644 phenomenon called the small-world effect, i.e., networks can be highly clustered with a small number  
645 of necessary steps to reach one node from another (Maier, 2019). However, several aspects should be  
646 highlighted. We identified CAZymes responsible for cellulose degradation, such as GH6 (Th0179  
647 and Ta0020), and other CAZY families with multiple activities or minor activities on lignocellulosic  
648 substrates, such as GH1 and GH5 (Th0179) (de Vries et al., 2017; Kameshwar et al., 2019) with a  
649 low number of minimum pathways to CRE1 in Ta0020. In contrast, CAZymes responsible for  
650 cellulose degradation, such as CBM1 domain (Th3844 and Ta0020) and GH7 (Ta0020), for  
651 hemicellulose degradation, such as GH55 (Th0179), and CAZY families with multiple activities or  
652 minor activities on lignocellulosic substrates, such as GH3 (Th3844) and GH1 (Ta0020) (de Vries et

## Degradation

653 al., 2017; Kameshwar et al., 2019), were identified with a high number of minimum pathways to  
654 XYR1. Because certain shortest paths are not necessarily unique, we also considered the number of  
655 possibilities that the paths may occur. Our results suggest that the number of possible minimum paths  
656 between some CAZymes and CRE1 or XYR1 was higher than of others. For example, a great  
657 number of possible shortest paths was observed between CRE1 and GH6 in Ta0020 and between  
658 CRE1 and GH10, GH6, or GH1 in Th0179. In contrast, in Ta0020, such profiles were observed  
659 between XYR1 and CAZymes with cellulolytic (AA9) and hemicellulolytic activities (GH16) and  
660 between CRE1 and GH6 with a CBM1 domain.

661 Furthermore, we performed a shortest path analysis to explore transitive transcripts between two  
662 nodes. Considering that the lowest number of transitive transcripts between two nodes may indicate  
663 the need for fewer signal pathways, representing a more direct relation, we chose to investigate the  
664 shortest paths with only one transcript between the desired targets. Interestingly, transcripts encoding  
665 proteins related to ATP synthesis were found between GH45 with a CBM1 domain and *cre1* and  
666 between GH1 and *cre1* in Th3844, which could be explained by the demand for energy required for  
667 CRE1 to exercise its repressor activity on these hydrolytic enzymes. However, in Th3844, a  
668 transcript encoding a protein involved in quality control processes that center on the endoplasmic  
669 reticulum was found between GH16 and *cre1*, indicating that a signaling pathway is triggered by  
670 CRE1 to repress the expression of such an enzyme. Curiously, in Ta0020, a phosphotyrosine  
671 phosphatase was found in the shortest path between GH1, which is a homolog of GH1 in the *T.*  
672 *harzianum* strains, and *cre1*. Such proteins are involved in posttranslational modification, including  
673 the phosphorylation process, which plays an essential role in signal transduction to achieve CCR by  
674 CRE1 (Horta et al., 2019; Han et al., 2020). In Th3844, we found a transcript encoding a protein  
675 related to the transport of substances across the mitochondrial membrane between CBM1 and *xyl1*,  
676 which may indicate high cellular activity and, therefore, a high demand for energy for gene  
677 expression. In Ta0020, a transcript encoding a protein involved in the regulation of chromatin and  
678 gene expression was found between GH1 and *xyl1*, which may indicate an intermediated process for  
679 the expression of such an enzyme.

680 Fungi have distinct regulatory systems that control the expression and secretion of genes encoding  
681 enzymes that degrade plant cell walls (de Vries and Makela, 2020). Even closely related species  
682 produce highly diverse enzyme sets when grown on the same plant biomass substrate (Benoit et al.,  
683 2015). Differences in enzyme production among related fungi in the genus *Trichoderma* have been  
684 reported (Horta et al., 2018; Almeida et al., 2020), raising questions regarding the stability of fungal  
685 genomes and the molecular mechanisms underlying such diversity. Here, we showed that the profile  
686 of transcripts coexpressed with XYR1 and CRE1 during cellulose degradation varies in  
687 phylogenetically close *T. harzianum* strains. These findings corroborate previous studies in which  
688 differences in biomass degradation and enzyme production between strains of the same species were  
689 reported (de Vries et al., 2017; Thanh et al., 2019; Tolgo et al., 2021). Such differences were more  
690 accentuated when the results of both strains were compared with those of Ta0020, a genetically  
691 distant strain.

692 In conclusion, biological networks represent a powerful approach to accelerate the elucidation of the  
693 molecular mechanisms underlying important biological processes. Here, we chose this methodology  
694 to clarify the functional activities of XYR1 and CRE1 in cellulose degradation among *T. harzianum*  
695 strains. Our findings suggest that the set of transcripts related to XYR1 and CRE1 varies among the  
696 studied *T. harzianum* strains, suggesting regulatory differences in enzymatic hydrolysis. Furthermore,  
697 such transcripts were not limited to CAZymes and other proteins related to biomass degradation.  
698 Thus, we suggest that both TFs play a role in the undirected regulation of genes encoding proteins



## XYR1 and CRE1 Response to Cellulose

### Degradation

699 related to cellulose degradation, and multiple pathways related to gene regulation, protein expression,  
700 and posttranslational modifications may be triggered by the studied TFs. Therefore, such activities  
701 could trigger cascades of biological reactions that could activate proteins related to cellulose  
702 depolymerization, confirming the importance of studying signal pathways in the recognition of  
703 diverse carbon sources. We expect that our results could contribute to a better understanding of  
704 fungal biodiversity, especially regarding the transcription regulation involved in hydrolytic enzyme  
705 expression in *T. harzianum*. This knowledge could be indispensable for developing genetic  
706 manipulation strategies and important for expanding the use of *T. harzianum* as an enzyme producer  
707 in biotechnological industrial applications.

### 708 Conflicts of interest

709 *The authors declare that the research was conducted in the absence of any commercial or financial*  
710 *relationships that could be construed as potential conflicts of interest.*

### 711 Author contributions

712 **RRR:** Writing - original draft, Methodology, and Conceptualization. **AHA:** Methodology, Software,  
713 Writing - review & editing, and Formal analysis. **DAA:** Resources, and Writing - review & editing.  
714 **JAFF:** Writing - review & editing. **MACH:** Resources and Writing - review & editing. **APS:**  
715 Supervision, review & editing, and funding acquisition.

### 716 Funding

717 Financial support for this work was provided by the São Paulo Research Foundation (FAPESP)  
718 (Process number 2015/09202-0 and 2018/19660-4), the Coordination of Improvement of Higher  
719 Education Personnel (CAPES, Computational Biology Program) (Process number  
720 88882.160095/2013-01) and the Brazilian National Council for Technological and Scientific  
721 Development (CNPq) (Process number 312777/2018-3). RRR received a master's fellowship from  
722 CAPES (88887.176241/2018-00 and 88882.329483/2019-01) and a PhD fellowship from CAPES  
723 (88887.482201/2020-00) and FAPESP (2020/13420-1). AHA received a PhD fellowship from  
724 FAPESP (2019/03232-6).

### 725 Abbreviations

726 **ABC:** ATP-binding cassette  
727 **CAZymes:** carbohydrate-active enzymes  
728 **CCR:** carbon catabolite repression  
729 **CEs:** carbohydrate esterases  
730 **CRE1:** carbon catabolite repressor 1  
731 **GHs:** glycoside hydrolases  
732 **GO:** Gene Ontology  
733 **GTs:** glycosyltransferases  
734 **HRR:** highest reciprocal rank  
735 **iTOL:** Interactive Tree of Life  
736 **ITS:** internal transcribed spacer  
737 **JTT:** Jones-Taylor-Thornton  
738 **K2P:** Kimura two-parameter

## Degradation

- 739 **KEGG:** Kyoto Encyclopedia of Genes and Genomes  
740 **KO:** KEGG Orthology  
741 **MEGA:** Molecular Evolutionary Genetics Analysis  
742 **MFS:** major facilitator superfamily  
743 **ML:** Maximum likelihood  
744 **PLs:** polysaccharide lyases  
745 **Ta0020:** *Trichoderma atroviride* CBMAI-0020  
746 **tef1:** translational elongation factor 1  
747 **TFs:** transcription factors  
748 **Th0179:** *Trichoderma harzianum* CBMAI-0179  
749 **Th3844:** *Trichoderma harzianum* IOC-3844  
750 **TOM:** topological overlap matrix  
751 **TPM:** transcripts per million  
752 **WGCNA:** weighted correlation network analysis  
753 **XYR1:** xylanase regulator 1

## 754 Acknowledgments

755 We are grateful to the Brazilian Biorenewables National Laboratory (LNBR), Campinas – SP for  
756 conducting the fermentation experiments; the Center of Molecular Biology and Genetic Engineering  
757 (CBMEG) at the University of Campinas, SP for the use of the center and laboratory space; and the  
758 São Paulo Research Foundation (FAPESP), the Coordination of Improvement of Higher Education  
759 Personnel (CAPES, Computational Biology Program), and the Brazilian National Council for  
760 Technological and Scientific Development (CNPq) for supporting the project and researchers.

## 761 Data availability statement

762 All data generated or analyzed in this study are included in this published article (and its  
763 supplementary information files). The raw RNA-Seq datasets were deposited at the NCBI Sequence  
764 Read Archive and can be accessed under the BioProject number PRJNA336221.

765

**Degradation**

766 **References**

- 767 Adnan, M., Zheng, W., Islam, W., Arif, M., Abubakar, Y.S., Wang, Z., et al. (2017). Carbon  
768 catabolite repression in filamentous fungi. *Int. J. Mol. Sci.* 19, 48. doi: 10.3390/ijms19010048
- 769 Alazi, E., and Ram, A.F.J. (2018). Modulating transcriptional regulation of plant biomass degrading  
770 enzyme networks for rational design of industrial fungal strains. *Front. Bioeng. Biotechnol.* 6,  
771 133. doi: 10.3389/fbioe.2018.00133
- 772 Alexa, A., and Rahnenfuhrer, J. (2021). topGO: Enrichment Analysis for Gene Ontology. R Package  
773 Version 2.44.0.
- 774 Almeida, D.A., Horta, M.A.C., Ferreira Filho, J.A., Murad, N.F., and de Souza, A.P. (2021). The  
775 synergistic actions of hydrolytic genes reveal the mechanism of *Trichoderma harzianum* for  
776 cellulose degradation. *J. Biotechnol.* 334, 1-10. doi: 10.1016/j.jbiotec.2021.05.001
- 777 Almeida, D.A., Horta, M.A.C., Filho, J.A.F., Murad, N.F., and de Souza, A.P. (2020). The  
778 synergistic actions of hydrolytic genes in coexpression networks reveal the potential of  
779 *Trichoderma harzianum* for cellulose degradation. *bioRxiv* 2020.01.14.906529.
- 780 Antonieto, A.C., Castro, L.D.S., Silva-Rocha, R., Persinoti, G.F., and Silva, R.N. (2014). Defining  
781 the genome-wide role of CRE1 during carbon catabolite repression in *Trichoderma reesei*  
782 using RNA-Seq analysis. *Fungal Genet. Biol.* 73, 93-103. doi: 10.1016/j.fgb.2014.10.009
- 783 Arntzen, M.O., Bengtsson, O., Varnai, A., Delogu, F., Mathiesen, G., and Eijsink, V.G.H. (2020).  
784 Quantitative comparison of the biomass-degrading enzyme repertoires of five filamentous  
785 fungi. *Sci. Rep.* 10, 20267. doi: 10.1038/s41598-020-75217-z
- 786 Ashburner, M., Ball, C.A., Blake, J.A., Botstein, D., Butler, H., Cherry, J.M., et al. (2000). Gene  
787 ontology: tool for the unification of biology. The gene ontology consortium. *Nat. Genet.* 25,  
788 25-29. doi: 10.1038/75556
- 789 Baroncelli, R., Piaggieschi, G., Fiorini, L., Bertolini, E., Zapparata, A., Pe, M.E., et al. (2015). Draft  
790 whole-genome sequence of the biocontrol agent *Trichoderma harzianum* T6776. *Genome*  
791 *Announc.* 3, e00647-15. doi: 10.1128/genomeA.00647-15
- 792 Benocci, T., Aguilar-Pontes, M.V., Zhou, M., Seiboth, B., and de Vries, R.P. (2017). Regulators of  
793 plant biomass degradation in ascomycetous fungi. *Biotechnol. Biofuels* 10, 152. doi:  
794 10.1186/s13068-017-0841-x
- 795 Benoit, I., Culleton, H., Zhou, M., DiFalco, M., Aguilar-Osorio, G., Battaglia, E., et al. (2015).  
796 Closely related fungi employ diverse enzymatic strategies to degrade plant biomass.  
797 *Biotechnol. Biofuels* 8, 107. doi: 10.1186/s13068-015-0285-0
- 798 Bischof, R.H., Ramoni, J., and Seiboth, B. (2016). Cellulases and beyond: the first 70 years of the  
799 enzyme producer *Trichoderma reesei*. *Microb. Cell Fact.* 15, 106. doi: 10.1186/s12934-016-  
800 0507-6

## Degradation

- 801 Borin, G.P., Carazzolle, M.F., Dos Santos, R.A.C., Riano-Pachon, D.M., and Oliveira, J.V.C. (2018).  
802 Gene Co-expression network reveals potential new genes related to sugarcane bagasse  
803 degradation in *Trichoderma reesei* RUT-30. *Front. Bioeng. Biotechnol.* 6, 151. doi:  
804 10.3389/fbioe.2018.00151
- 805 Burger, G., Gray, M.W., and Lang, B.F. (2003). Mitochondrial genomes: anything goes. *Trends*  
806 *Genet.* 19, 709-716. doi: 10.1016/j.tig.2003.10.012
- 807 Castro, L.D.S., de Paula, R.G., Antonieto, A.C., Persinoti, G.F., Silva-Rocha, R., and Silva, R.N.  
808 (2016). Understanding the role of the master regulator XYR1 in *Trichoderma reesei* by global  
809 transcriptional analysis. *Front. Microbiol.* 7, 175. doi: 10.3389/fmicb.2016.00175
- 810 Chadha, S., Mehetre, S.T., Bansal, R., Kuo, A., Aerts, A., Grigoriev, I.V., et al. (2018). Genome-  
811 wide analysis of cytochrome P450s of *Trichoderma* spp.: annotation and evolutionary  
812 relationships. *Fungal Biol. Biotechnol.* 5, 12. doi: 10.1186/s40694-018-0056-3
- 813 Chen, L., Zou, G., Wang, J., Wang, J., Liu, R., Jiang, Y., et al. (2016). Characterization of the Ca(2+)  
814 -responsive signaling pathway in regulating the expression and secretion of cellulases in  
815 *Trichoderma reesei* Rut-C30. *Mol. Microbiol.* 100, 560-575. doi: 10.1111/mmi.13334
- 816 Cock, P.J., Antao, T., Chang, J.T., Chapman, B.A., Cox, C.J., Dalke, A., et al. (2009). Biopython:  
817 freely available Python tools for computational molecular biology and bioinformatics.  
818 *Bioinformatics* 25, 1422-1423. doi: 10.1093/bioinformatics/btp163
- 819 Cziferszky, A., Mach, R.L., and Kubicek, C.P. (2002). Phosphorylation positively regulates DNA  
820 binding of the carbon catabolite repressor Cre1 of *Hypocrea jecorina* (*Trichoderma reesei*). *J.*  
821 *Biol. Chem.* 277, 14688-14694. doi: 10.1074/jbc.M200744200
- 822 de Assis, L.J., Ries, L.N., Savoldi, M., Dos Reis, T.F., Brown, N.A., and Goldman, G.H. (2015).  
823 *Aspergillus nidulans* protein kinase A plays an important role in cellulase production.  
824 *Biotechnol. Biofuels* 8, 213. doi: 10.1186/s13068-015-0401-1
- 825 de Assis, L.J., Silva, L.P., Bayram, O., Dowling, P., Kniemeyer, O., Kruger, T., et al. (2021). Carbon  
826 catabolite repression in filamentous fungi is regulated by phosphorylation of the transcription  
827 factor CreA. *mBio* 12, e03146-20. doi: 10.1128/mBio.03146-20
- 828 de Vries, R.P., and Makela, M.R. (2020). Genomic and postgenomic diversity of fungal plant  
829 biomass degradation approaches. *Trends Microbiol.* 28, 487-499. doi:  
830 10.1016/j.tim.2020.01.004
- 831 de Vries, R.P., Riley, R., Wiebenga, A., Aguilar-Osorio, G., Amillis, S., Uchima, C.A., et al. (2017).  
832 Comparative genomics reveals high biological diversity and specific adaptations in the  
833 industrially and medically important fungal genus *Aspergillus*. *Genome Biol.* 18, 28. doi:  
834 10.1186/s13059-017-1151-0
- 835 Delabona, P.D.S., Codima, C.A., Ramoni, J., Zubieta, M.P., de Araujo, B.M., Farinas, C.S., et al.  
836 (2020). The impact of putative methyltransferase overexpression on the *Trichoderma*  
837 *harzianum* cellulolytic system for biomass conversion. *Bioresour. Technol.* 313, 123616. doi:  
838 10.1016/j.biortech.2020.123616

## XYR1 and CRE1 Response to Cellulose

### Degradation

- 839 Delabona, P.D.S., Lima, D.J., Codima, C.A., Ramoni, J., Gelain, L., de Melo, V.S., et al. (2021).  
840 Replacement of the carbon catabolite regulator (*cre1*) and fed-batch cultivation as strategies to  
841 enhance cellulase production in *Trichoderma harzianum*. *Bioresour. Technol. Rep.* 13,  
842 100634. doi: 10.1016/j.biteb.2021.100634
- 843 Delabona, P.D.S., Rodrigues, G.N., Zubieta, M.P., Ramoni, J., Codima, C.A., Lima, D.J., et al.  
844 (2017). The relation between *xyr1* overexpression in *Trichoderma harzianum* and sugarcane  
845 bagasse saccharification performance. *J. Biotechnol.* 246, 24-32. doi:  
846 10.1016/j.jbiotec.2017.02.002
- 847 Dodd, S.L., Lieckfeldt, E., and Samuels, G.J. (2003). *Hypocrea atroviridis* sp. nov., the teleomorph of  
848 *Trichoderma atroviride*. *Mycologia* 95, 27-40. doi: 10.1080/15572536.2004.11833129
- 849 Druzhinina, I.S., Chenthamara, K., Zhang, J., Atanasova, L., Yang, D., Miao, Y., et al. (2018).  
850 Massive lateral transfer of genes encoding plant cell wall-degrading enzymes to the  
851 mycoparasitic fungus *Trichoderma* from its plant-associated hosts. *PLoS Genet.* 14,  
852 e1007322. doi: 10.1371/journal.pgen.1007322
- 853 Druzhinina, I.S., Kopchinskiy, A.G., and Kubicek, C.P. (2006). The first 100 *Trichoderma* species  
854 characterized by molecular data. *Mycoscience* 47, 55-64. doi: 10.1007/s10267-006-0279-7
- 855 Druzhinina, I.S., Kubicek, C.P., Komon-Zelazowska, M., Mulaw, T.B., and Bissett, J. (2010). The  
856 *Trichoderma harzianum* demon: complex speciation history resulting in coexistence of  
857 hypothetical biological species, recent agamospecies and numerous relict lineages. *BMC*  
858 *Evol. Biol.* 10, 94. doi: 10.1186/1471-2148-10-94
- 859 Fan, J., Urban, M., Parker, J.E., Brewer, H.C., Kelly, S.L., Hammond-Kosack, K.E., et al. (2013).  
860 Characterization of the sterol 14 $\alpha$ -demethylases of *Fusarium graminearum* identifies a  
861 novel genus-specific CYP51 function. *New Phytol.* 198, 821-835. doi: 10.1111/nph.12193
- 862 Felsenstein, J. (1985). Confidence limits on phylogenies: an approach using the bootstrap. *Evolution*  
863 39, 783-791. doi: 10.2307/2408678
- 864 Grevel, A., and Becker, T. (2020). Porins as helpers in mitochondrial protein translocation. *Biol.*  
865 *Chem.* 401, 699-708. doi: 10.1515/hsz-2019-0438
- 866 Gruber, S., and Seidl-Seiboth, V. (2012). Self versus non-self: fungal cell wall degradation in  
867 *Trichoderma*. *Microbiology (Reading)* 158, 26-34. doi: 10.1099/mic.0.052613-0
- 868 Gruber, S., and Zeilinger, S. (2014). The transcription factor Ste12 mediates the regulatory role of the  
869 Tmk1 MAP kinase in mycoparasitism and vegetative hyphal fusion in the filamentous fungus  
870 *Trichoderma atroviride*. *PLoS One* 9, e111636. doi: 10.1371/journal.pone.0111636
- 871 Hahn, T., Tafi, E., Paul, A., Salvia, R., Falabella, P., and Zibek, S. (2020). Current state of chitin  
872 purification and chitosan production from insects. *J. Chem. Technol. Biotechnol.* 95, 2775-  
873 2795. doi: 10.1002/jctb.6533
- 874 Han, L., Tan, Y., Ma, W., Niu, K., Hou, S., Guo, W., et al. (2020). Precision engineering of the  
875 transcription factor *Cre1* in *Hypocrea jecorina* (*Trichoderma reesei*) for efficient cellulase

## Degradation

- 876 production in the presence of glucose. *Front. Bioeng. Biotechnol.* 8, 852. doi:  
877 10.3389/fbioe.2020.00852
- 878 Harris, S.D., Hamer, L., Sharpless, K.E., and Hamer, J.E. (1997). The *Aspergillus nidulans* sepA  
879 gene encodes an FH1/2 protein involved in cytokinesis and the maintenance of cellular  
880 polarity. *EMBO J.* 16, 3474-3483. doi: 10.1093/emboj/16.12.3474
- 881 Hinterdobler, W., Li, G., Turrà, D., Schalamun, M., Kindel, S., Sauer, U., et al. (2021). Integration of  
882 chemosensing and carbon catabolite repression impacts fungal enzyme regulation and plant  
883 associations. *bioRxiv* 2021.05.06.442915.
- 884 Hoi, J.W.S., and Dumas, B. (2010). Ste12 and Ste12-like proteins, fungal transcription factors  
885 regulating development and pathogenicity. *Eukaryot. Cell* 9, 480-485. doi:  
886 10.1128/EC.00333-09
- 887 Horta, M.A.C., Filho, J.A.F., Murad, N.F., Santos, E.D.O., Dos Santos, C.A., Mendes, J.S., et al.  
888 (2018). Network of proteins, enzymes and genes linked to biomass degradation shared by  
889 *Trichoderma* species. *Sci. Rep.* 8, 1341. doi: 10.1038/s41598-018-19671-w
- 890 Horta, M.A.C., Thieme, N., Gao, Y., Burnum-Johnson, K.E., Nicora, C.D., Gritsenko, M.A., et al.  
891 (2019). Broad Substrate-Specific Phosphorylation Events Are Associated With the Initial  
892 Stage of Plant Cell Wall Recognition in *Neurospora crassa*. *Front. Microbiol.* 10, 2317. doi:  
893 10.3389/fmicb.2019.02317
- 894 Jankowsky, E. (2011). RNA helicases at work: binding and rearranging. *Trends Biochem. Sci.* 36,  
895 19-29. doi: 10.1016/j.tibs.2010.07.008
- 896 Jones, D.T., Taylor, W.R., and Thornton, J.M. (1992). The rapid generation of mutation data matrices  
897 from protein sequences. *Comput. Appl. Biosci.* 8, 275-282. doi:  
898 10.1093/bioinformatics/8.3.275
- 899 Kameshwar, A.K.S., Ramos, L.P., and Qin, W. (2019). CAZymes-based ranking of fungi (CBRF): an  
900 interactive web database for identifying fungi with extrinsic plant biomass degrading abilities.  
901 *Bioresour. Bioprocess.* 6, 51. doi: 10.1186/s40643-019-0286-0
- 902 Kanehisa, M., and Goto, S. (2000). KEGG: kyoto encyclopedia of genes and genomes. *Nucleic Acids*  
903 *Res.* 28, 27-30. doi: 10.1093/nar/28.1.27
- 904 Kimura, M. (1980). A simple method for estimating evolutionary rates of base substitutions through  
905 comparative studies of nucleotide sequences. *J. Mol. Evol.* 16, 111-120. doi:  
906 10.1007/BF01731581
- 907 Klaubauf, S., Narang, H.M., Post, H., Zhou, M., Brunner, K., Mach-Aigner, A.R., et al. (2014).  
908 Similar is not the same: differences in the function of the (hemi-)cellulolytic regulator XlnR  
909 (Xlr1/Xyr1) in filamentous fungi. *Fungal Genet. Biol.* 72, 73-81. doi:  
910 10.1016/j.fgb.2014.07.007
- 911 Kolde, R. (2019). Pheatmap: Pretty Heatmaps. R Package Version 1.0.12.

## XYR1 and CRE1 Response to Cellulose

### Degradation

- 912 Koutrouli, M., Karatzas, E., Paez-Espino, D., and Pavlopoulos, G.A. (2020). A guide to conquer the  
913 biological network era using graph theory. *Front. Bioeng. Biotechnol.* 8, 34. doi:  
914 10.3389/fbioe.2020.00034
- 915 Kouzarides, T. (2007). Chromatin modifications and their function. *Cell* 128, 693-705. doi:  
916 10.1016/j.cell.2007.02.005
- 917 Kubicek, C.P., Herrera-Estrella, A., Seidl-Seiboth, V., Martinez, D.A., Druzhinina, I.S., Thon, M., et  
918 al. (2011). Comparative genome sequence analysis underscores mycoparasitism as the  
919 ancestral life style of *Trichoderma*. *Genome Biol.* 12, R40. doi: 10.1186/gb-2011-12-4-r40
- 920 Kubicek, C.P., Steindorff, A.S., Chenthamara, K., Manganiello, G., Henrissat, B., Zhang, J., et al.  
921 (2019). Evolution and comparative genomics of the most common *Trichoderma* species.  
922 *BMC Genom.* 20, 485. doi: 10.1186/s12864-019-5680-7
- 923 Kumar, S., Stecher, G., and Tamura, K. (2016). MEGA7: molecular evolutionary genetics analysis  
924 version 7.0 for bigger datasets. *Mol. Biol. Evol.* 33, 1870-1874. doi: 10.1093/molbev/msw054
- 925 Langfelder, P., and Horvath, S. (2008). WGCNA: an R package for weighted correlation network  
926 analysis. *BMC Bioinform.* 9, 559. doi: 10.1186/1471-2105-9-559
- 927 Langfelder, P., Zhang, B., and Horvath, S. (2008). Defining clusters from a hierarchical cluster tree:  
928 the Dynamic Tree Cut package for R. *Bioinformatics* 24, 719-720. doi:  
929 10.1093/bioinformatics/btm563
- 930 Li, C.X., Zhao, S., Luo, X.M., and Feng, J.X. (2020a). Weighted gene co-expression network  
931 analysis identifies critical genes for the production of cellulase and xylanase in *penicillium*  
932 *oxalicum*. *Front. Microbiol.* 11, 520. doi: 10.3389/fmicb.2020.00520
- 933 Li, J.X., Zhang, F., Jiang, D.D., Li, J., Wang, F.L., Zhang, Z., et al. (2020b). Diversity of cellulase-  
934 producing filamentous fungi from tibet and transcriptomic analysis of a superior cellulase  
935 producer *Trichoderma harzianum* LZ117. *Front. Microbiol.* 11, 1617. doi:  
936 10.3389/fmicb.2020.01617
- 937 Lichius, A., Seidl-Seiboth, V., Seiboth, B., and Kubicek, C.P. (2014). Nucleo-cytoplasmic shuttling  
938 dynamics of the transcriptional regulators XYR1 and CRE1 under conditions of cellulase and  
939 xylanase gene expression in *Trichoderma reesei*. *Mol. Microbiol.* 94, 1162-1178. doi:  
940 10.1111/mmi.12824
- 941 Lombard, V., Ramulu, H.G., Drula, E., Coutinho, P.M., and Henrissat, B. (2014). The carbohydrate-  
942 active enzymes database (CAZy) in 2013. *Nucleic Acids Res.* 42, D490-D495. doi:  
943 10.1093/nar/gkt1178
- 944 Luscombe, N.M., Babu, M.M., Yu, H., Snyder, M., Teichmann, S.A., Gerstein, M. (2004). Genomic  
945 analysis of regulatory network dynamics reveals large topological changes. *Nature*. Sep  
946 16;431(7006):308-12. doi: 10.1038/nature02782. PMID: 15372033
- 947 Mach-Aigner, A.R., Pucher, M.E., Steiger, M.G., Bauer, G.E., Preis, S.J., and Mach, R.L. (2008).  
948 Transcriptional regulation of *xyr1*, encoding the main regulator of the xylanolytic and

## Degradation

- 949 cellulolytic enzyme system in *Hypocrea jecorina*. Appl. Environ. Microbiol. 74, 6554-6562.  
950 doi: 10.1128/AEM.01143-08
- 951 Maier, B.F. (2019). Generalization of the small-world effect on a model approaching the Erdos-Renyi  
952 random graph. Sci. Rep. 9, 9268. doi: 10.1038/s41598-019-45576-3
- 953 Malmierca, M.G., McCormick, S.P., Cardoza, R.E., Alexander, N.J., Monte, E., and Gutierrez, S.  
954 (2015). Production of trichodiene by *Trichoderma harzianum* alters the perception of this  
955 biocontrol strain by plants and antagonized fungi. Environ. Microbiol. 17, 2628-2646. doi:  
956 10.1111/1462-2920.12506
- 957 Martinez, D., Berka, R.M., Henrissat, B., Saloheimo, M., Arvas, M., Baker, S.E., et al. (2008).  
958 Genome sequencing and analysis of the biomass-degrading fungus *Trichoderma reesei* (syn.  
959 *Hypocrea jecorina*). Nat. Biotechnol. 26, 553-560. doi: 10.1038/nbt1403
- 960 Martins-Santana, L., Paula, R.G., Silva, A.G., Lopes, D.C.B., Silva, R.D.N., and Silva-Rocha, R.  
961 (2020). CRZ1 regulator and calcium cooperatively modulate holocellulases gene expression  
962 in *Trichoderma reesei* QM6a. Genet. Mol. Biol. 43, e20190244. doi: 10.1590/1678-4685-  
963 GMB-2019-0244
- 964 Maruyama, C.R., Bilesky-Jose, N., de Lima, R., and Fraceto, L.F. (2020). Encapsulation of  
965 *Trichoderma harzianum* preserves enzymatic activity and enhances the potential for biological  
966 control. Front. Bioeng. Biotechnol. 8, 225. doi: 10.3389/fbioe.2020.00225
- 967 Medeiros, H.A., Filho, J.V.A., Freitas, L.G., Castillo, P., Rubio, M.B., Hermosa, R., et al. (2017).  
968 Tomato progeny inherit resistance to the nematode *Meloidogyne javanica* linked to plant  
969 growth induced by the biocontrol fungus *Trichoderma atroviride*. Sci. Rep. 7, 40216. doi:  
970 10.1038/srep40216
- 971 Mello-de-Sousa, T.M., Gorsche, R., Rassinger, A., Pocas-Fonseca, M.J., Mach, R.L., and Mach-  
972 Aigner, A.R. (2014). A truncated form of the Carbon catabolite repressor 1 increases cellulase  
973 production in *Trichoderma reesei*. Biotechnol. Biofuels 7, 129. doi: 10.1186/s13068-014-  
974 0129-3
- 975 Monroy, A.A., Stappler, E., Schuster, A., Sulyok, M., and Schmoll, M. (2017). A CRE1- regulated  
976 cluster is responsible for light dependent production of dihydrotrichotetronin in *Trichoderma*  
977 *reesei*. PLoS One 12, e0182530. doi: 10.1371/journal.pone.0182530
- 978 Mukherjee, P.K., Nautiyal, C.S., and Mukhopadhyay, A.N. (2008). "Molecular mechanisms of  
979 biocontrol by *Trichoderma* spp," in Molecular Mechanisms of Plant and Microbe  
980 Coexistence, eds. C.S. Nautiyal & P. Dion (Berlin, Heidelberg: Springer Berlin Heidelberg),  
981 243-262.
- 982 Mutwil, M., Usadel, B., Schutte, M., Loraine, A., Ebenhoh, O., and Persson, S. (2010). Assembly of  
983 an interactive correlation network for the Arabidopsis genome using a novel heuristic  
984 clustering algorithm. Plant Physiol. 152, 29-43. doi: 10.1104/pp.109.145318
- 985 Nasa, I., and Kettenbach, A.N. (2018). Coordination of protein kinase and phosphoprotein  
986 phosphatase activities in mitosis. Front. Cell Dev. Biol. 6, 30. doi: 10.3389/fcell.2018.00030



## XYR1 and CRE1 Response to Cellulose

### Degradation

- 987 Neupane, P., Bhujju, S., Thapa, N., and Bhattarai, H.K. (2019). ATP synthase: structure, function and  
988 inhibition. *Biomol. Concepts* 10, 1-10. doi: 10.1515/bmc-2019-0001
- 989 Pavlopoulos, G.A., Secrier, M., Moschopoulos, C.N., Soldatos, T.G., Kossida, S., Aerts, J., et al.  
990 (2011). Using graph theory to analyze biological networks. *BioData Min.* 4, 10. doi:  
991 10.1186/1756-0381-4-10
- 992 Phillips, B.P., Gomez-Navarro, N., and Miller, E.A. (2020). Protein quality control in the  
993 endoplasmic reticulum. *Curr. Opin. Cell Biol.* 65, 96-102. doi: 10.1016/j.ceb.2020.04.002
- 994 Portnoy, T., Margeot, A., Linke, R., Atanasova, L., Fekete, E., Sandor, E., et al. (2011). The CRE1  
995 carbon catabolite repressor of the fungus *Trichoderma reesei*: a master regulator of carbon  
996 assimilation. *BMC Genom.* 12, 269. doi: 10.1186/1471-2164-12-269
- 997 R Core Team (2018). *R: A Language and Environment for Statistical Computing*. Vienna, Austria: R  
998 Foundation for Statistical Computing.
- 999 Reithner, B., Mach-Aigner, A.R., Herrera-Estrella, A., and Mach, R.L. (2014). *Trichoderma*  
1000 *atroviride* transcriptional regulator Xyr1 supports the induction of systemic resistance in  
1001 plants. *Appl. Environ. Microbiol.* 80, 5274-5281. doi: 10.1128/AEM.00930-14
- 1002 Ries, L., Belshaw, N.J., Ilmen, M., Penttila, M.E., Alapuranen, M., and Archer, D.B. (2014). The role  
1003 of CRE1 in nucleosome positioning within the *cbh1* promoter and coding regions of  
1004 *Trichoderma reesei*. *Appl. Microbiol. Biotechnol.* 98, 749-762. doi: 10.1007/s00253-013-  
1005 5354-3
- 1006 Sanner, M.F. (1999). Python: a programming language for software integration and development. *J.*  
1007 *Mol. Graph. Model.* 17, 57-61. doi: 10.1186/1471-2105-4-2
- 1008 Saravanakumar, K., Li, Y., Yu, C., Wang, Q.Q., Wang, M., Sun, J., et al. (2017). Effect of  
1009 *Trichoderma harzianum* on maize rhizosphere microbiome and biocontrol of *Fusarium* Stalk  
1010 rot. *Sci. Rep.* 7, 1771. doi: 10.1038/s41598-017-01680-w
- 1011 Scardoni, G., Tosadori, G., Pratap, S., Spoto, F., and Laudanna, C. (2016). Finding the shortest path  
1012 with PesCa: a tool for network reconstruction. *F1000Research* 4, 484. doi:  
1013 10.12688/f1000research.6769.2
- 1014 Schmoll, M. (2018). Light, stress, sex and carbon - The photoreceptor ENVOY as a central  
1015 checkpoint in the physiology of *Trichoderma reesei*. *Fungal Biol.* 122, 479-486. doi:  
1016 10.1016/j.funbio.2017.10.007
- 1017 Schmoll, M., Dattenbock, C., Carreras-Villasenor, N., Mendoza-Mendoza, A., Tisch, D., Aleman,  
1018 M.I., et al. (2016). The genomes of three uneven siblings: footprints of the lifestyles of three  
1019 trichoderma species. *Microbiol. Mol. Biol. Rev.* 80, 205-327. doi: 10.1128/MMBR.00040-15
- 1020 Schoch, C.L., Seifert, K.A., Huhndorf, S., Robert, V., Spouge, J.L., Levesque, C.A., et al. (2012).  
1021 Nuclear ribosomal internal transcribed spacer (ITS) region as a universal DNA barcode  
1022 marker for Fungi. *Proc. Natl. Acad. Sci. U. S. A.* 109, 6241-6246. doi:  
1023 10.1073/pnas.1117018109

## Degradation

- 1024 Shannon, P., Markiel, A., Ozier, O., Baliga, N.S., Wang, J.T., Ramage, D., et al. (2003). Cytoscape: a  
1025 software environment for integrated models of biomolecular interaction networks. *Genome*  
1026 *Res.* 13, 2498-2504. doi: 10.1101/gr.1239303
- 1027 Siewers, V., Viaud, M., Jimenez-Teja, D., Collado, I.G., Gronover, C.S., Pradier, J.M., et al. (2005).  
1028 Functional analysis of the cytochrome P450 monooxygenase gene *bcbot1* of *Botrytis cinerea*  
1029 indicates that botrydial is a strain-specific virulence factor. *Mol. Plant-Microbe Interact.* 18,  
1030 602-612. doi: 10.1094/MPMI-18-0602
- 1031 Sloothak, J., Tamayo-Ramos, J.A., Odoni, D.I., Laathanachareon, T., Derntl, C., Mach-Aigner,  
1032 A.R., et al. (2016). Identification and functional characterization of novel xylose transporters  
1033 from the cell factories *Aspergillus niger* and *Trichoderma reesei*. *Biotechnol. Biofuels* 9, 148.  
1034 doi: 10.1186/s13068-016-0564-4
- 1035 Strauss, J., Mach, R.L., Zeilinger, S., Hartler, G., Stöffler, G., Wolschek, M., et al. (1995). Cre1, the  
1036 carbon catabolite repressor protein from *Trichoderma reesei*. *FEBS Lett.* 376, 103-107. doi:  
1037 10.1016/0014-5793(95)01255-5
- 1038 Stricker, A.R., Grosstessner-Hain, K., Wurleitner, E., and Mach, R.L. (2006). Xyr1 (xylanase  
1039 regulator 1) regulates both the hydrolytic enzyme system and D-xylose metabolism in  
1040 *Hypocrea jecorina*. *Eukaryot. Cell* 5, 2128-2137. doi: 10.1128/EC.00211-06
- 1041 Supek, F., Bosnjak, M., Skunca, N., and Smuc, T. (2011). REVIGO summarizes and visualizes long  
1042 lists of gene ontology terms. *PLoS One* 6, e21800. doi: 10.1371/journal.pone.0021800
- 1043 Thanh, V.N., Thuy, N.T., Huong, H.T.T., Hien, D.D., Hang, D.T.M., Anh, D.T.K., et al. (2019).  
1044 Surveying of acid-tolerant thermophilic lignocellulolytic fungi in Vietnam reveals  
1045 surprisingly high genetic diversity. *Sci. Rep.* 9, 3674. doi: 10.1038/s41598-019-40213-5
- 1046 Thompson, J.D., Higgins, D.G., and Gibson, T.J. (1994). CLUSTAL W: improving the sensitivity of  
1047 progressive multiple sequence alignment through sequence weighting, position-specific gap  
1048 penalties and weight matrix choice. *Nucleic Acids Res.* 22, 4673-4680. doi:  
1049 10.1093/nar/22.22.4673
- 1050 Tolgo, M., Huttner, S., Rugbjerg, P., Thuy, N.T., Thanh, V.N., Larsbrink, J., et al. (2021). Genomic  
1051 and transcriptomic analysis of the thermophilic lignocellulose-degrading fungus *Thielavia*  
1052 *terrestris* LPH172. *Biotechnol. Biofuels* 14, 131. doi: 10.1186/s13068-021-01975-1
- 1053 UniProt Consortium. (2019). UniProt: a worldwide hub of protein knowledge. *Nucleic Acids Res.* 47,  
1054 D506-D515. doi: 10.1093/nar/gky1049
- 1055 Vallim, M.A., Miller, K.Y., and Miller, B.L. (2000). *Aspergillus* SteA (sterile12-like) is a  
1056 homeodomain-C2/H2-Zn<sup>2+</sup> finger transcription factor required for sexual reproduction. *Mol.*  
1057 *Microbiol.* 36, 290-301. doi: 10.1046/j.1365-2958.2000.01874.x
- 1058 Whitehouse, D.G., May, B., and Moore, A.L. (2019). "Respiratory chain and ATP synthase," in  
1059 Reference Module in Biomedical Sciences (Elsevier). doi: 10.1016/B978-0-12-801238-  
1060 3.95732-5

## **XYR1 and CRE1 Response to Cellulose**

### **Degradation**

- 1061 Wolfe, C.J., Kohane, I.S., and Butte, A.J. (2005). Systematic survey reveals general applicability of  
1062 "guilt-by-association" within gene coexpression networks. *BMC Bioinform.* 6, 227. doi:  
1063 10.1186/1471-2105-6-227
- 1064 Yan, L., and Khan, R.A.A. (2021). Biological control of bacterial wilt in tomato through the  
1065 metabolites produced by the biocontrol fungus, *Trichoderma harzianum*. *Egypt. J. Biol. Pest*  
1066 *Control* 31, 5. doi: 10.1186/s41938-020-00351-9
- 1067 Zeilinger, S., and Atanasova, L. (2020). "Chapter 2 - Sensing and regulation of mycoparasitism-  
1068 relevant processes in *Trichoderma*," in *New and Future Developments in Microbial*  
1069 *Biotechnology and Bioengineering*, eds. V.K. Gupta, S. Zeilinger, H.B. Singh & I. Druzhinina  
1070 (Amsterdam: Elsevier), 39-55.
- 1071 Zeilinger, S., Schmoll, M., Pail, M., Mach, R.L., and Kubicek, C.P. (2003). Nucleosome transactions  
1072 on the *Hypocrea jecorina* (*Trichoderma reesei*) cellulase promoter *cbh2* associated with  
1073 cellulase induction. *Mol. Genet. Genom.* 270, 46-55. doi: 10.1007/s00438-003-0895-2
- 1074 Zhang, W., Kou, Y., Xu, J., Cao, Y., Zhao, G., Shao, J., et al. (2013). Two major facilitator  
1075 superfamily sugar transporters from *Trichoderma reesei* and their roles in induction of  
1076 cellulase biosynthesis. *J. Biol. Chem.* 288, 32861-32872. doi: 10.1074/jbc.M113.505826
- 1077 Zhang, Y., Yang, J., Luo, L., Wang, E., Wang, R., Liu, L., et al. (2020). Low-cost cellulase-  
1078 hemicellulase mixture secreted by *Trichoderma harzianum* EM0925 with complete  
1079 saccharification efficacy of lignocellulose. *Int. J. Mol. Sci.* 21, 371. doi:  
1080 10.3390/ijms21020371
- 1081

## Degradation

### 1082 Figure legends

1083 **Figure 1. Molecular phylogenies of CRE1 and XYR1 in *Trichoderma* spp.** The complete protein  
1084 sequences related to CRE1 (A) and XYR1 (B) were used to infer the phylogenetic relationships of  
1085 the studied strains in the genus *Trichoderma*. The phylogenetic trees were constructed using MEGA7  
1086 software and edited using the iTOL program. *Fusarium* spp. were used as an outgroup.

1087 **Figure 2. KO functional classification of the transcripts identified in the *cre1* and *xyl1* groups.**  
1088 The sequences related to the enzymes coexpressed with *cre1* (A) and *xyl1* (B) were annotated  
1089 according to the main KO functions of Th3844, Th0179, and Ta0020. Ta0020: *T. atroviride* CBMAI-  
1090 0020; Th0179: *T. harzianum* CBMAI-0179; Th3844: *T. harzianum* IOC-3844; KO: Kyoto  
1091 Encyclopedia of Genes and Genomes Orthology.

1092 **Figure 3. Comparisons of TFs, transporters, and CAZymes among strains and groups.** Number  
1093 of transcripts encoding TFs, transporters, and CAZymes in Ta0020, Th0179 and Th3844 distributed  
1094 among the *cre1* (A) and *xyl1* (B) groups. TFs: transcription factors; CAZymes: carbohydrate-active  
1095 enzymes. Ta0020: *T. atroviride* CBMAI-0020; Th0179: *T. harzianum* CBMAI-0179; Th3844: *T.*  
1096 *harzianum* IOC-3844.

1097 **Figure 4. Distribution of CAZyme families in the *cre1* and *xyl1* groups.** Classification of  
1098 CAZyme families coexpressed with *cre1* (A) and *xyl1* (B) in Th3844, Th0179, and Ta0020 and  
1099 quantification of each CAZyme family in the *cre1* groups (C) and *xyl1* groups. PL: polysaccharide  
1100 lyase; GH: glycoside hydrolase; GT: glycosyltransferase; CE: carbohydrate esterase; Ta0020: *T.*  
1101 *atroviride* CBMAI-0020; Th0179: *T. harzianum* CBMAI-0179; Th3844: *T. harzianum* IOC-3844.

1102 **Figure 5. Distribution of TFs in the *cre1* and *xyl1* groups in *Trichoderma* spp.** Classification of  
1103 TFs coexpressed with *cre1* (A) and *xyl1* (B) in Th3844, Th0179, and Ta0020. MFS: major facilitator  
1104 superfamily; ABC: ATP-binding cassette; Th3844: *T. harzianum* IOC-3844; Th0179: *T. harzianum*  
1105 CBMAI-0179; Ta0020: *T. atroviride* CBMAI-0020.

1106 **Figure 6. Distribution of transporters in the *cre1* and *xyl1* groups in *Trichoderma* spp.**  
1107 Classification of transporters coexpressed with *cre1* (A) and *xyl1* (B) in Th3844, Th0179, and  
1108 Ta0020. MFS: major facilitator superfamily; ABC: ATP-binding cassette; Th3844: *T. harzianum*  
1109 IOC-3844; Th0179: *T. harzianum* CBMAI-0179; Ta0020: *T. atroviride* CBMAI-0020.

1110 **Figure 7. Modeled global networks of Th3844, Th0179, and Ta0020.** The transcriptome datasets  
1111 were used to infer the global HRR networks of (A) Th3844, (B) Th0179, and (C) Ta0020. The  
1112 networks were modeled and edited using Cytoscape software.

1113 **Figure 8. Modeled subnetworks of the *cre1* and *xyl1* groups of the evaluated strains.** The global  
1114 networks were partitioned, and subnetworks of Th3844 (A), Th0179 (B) and Ta0020 (C) related to  
1115 *cre1* and Th3844 (D), Th0179 (E) and Ta0020 (F) related to *xyl1* were formed. Th3844: *T.*  
1116 *harzianum* IOC-3844; Th0179: *T. harzianum* CBMAI-0179; Ta0020: *T. atroviride* CBMAI-0020;  
1117 TF: transcription factor.

1118 **Figure 9. Heatmap plotted based on the shortest pathway between XYR1 or CRE1 and**  
1119 **CAZymes in all evaluated *Trichoderma* spp.** Number of shortest pathways between XYR1 or  
1120 CRE1 and the selected CAZymes (A) and number of possibilities of such an event occurring (B).  
1121 Th3844: *T. harzianum* IOC-3844; Th0179: *T. harzianum* CBMAI-0179; Ta0020: *T. atroviride*  
1122 CBMAI-0020.

## XYR1 and CRE1 Response to Cellulose

### Degradation

1123 **Tables**

1124 **Table 1.** Neighbors of the transcripts *xyr1* and *cre1* in Th3844.

| First neighbors |                                    |       |              |                                      |       |
|-----------------|------------------------------------|-------|--------------|--------------------------------------|-------|
| Th3844          |                                    |       |              |                                      |       |
| CRE1            |                                    |       | XYR1         |                                      |       |
| Gene ID         | Description                        | Group | Gene ID      | Description                          | Group |
| THAR02_06363    | Zn2Cys6 transcriptional regulator  | 29    | THAR02_07076 | regulator-nonsense transcripts 1     | 9     |
| THAR02_10232    | phosphate:H <sup>+</sup> symporter | 13    | THAR02_00049 | polysaccharide lyase family 7        | 11    |
| THAR02_07487    | Mg <sup>2+</sup> transporter       | 78    | THAR02_09951 | MFS permease                         | 70    |
| THAR02_07586    | cytochrome P450 CYP2 subfamily     | 39    | THAR02_01555 | MFS permease                         | 0     |
| THAR02_07548    | C2H2 transcriptional regulator     | 13    | THAR02_00890 | glycoside hydrolase family 3         | 0     |
| THAR02_04042    | acid phosphatase                   | 8     | THAR02_09118 | fungal specific transcription factor | 26    |

1125

**Degradation**

1126 **Table 2.** Neighbors of the transcripts *xyr1* and *cre1* in Th0179.

| First neighbors |                                   |       |              |                                |       |
|-----------------|-----------------------------------|-------|--------------|--------------------------------|-------|
| Th0179          |                                   |       |              |                                |       |
| CRE1            |                                   |       | XYR1         |                                |       |
| Gene ID         | Description                       | Group | Gene ID      | Description                    | Group |
| THAR02_03655    | proteasome subunit alpha type-5   | 70    | THAR02_00084 | MFS transporter                | 63    |
| THAR02_06292    | restriction of telomere capping 5 | 53    | THAR02_02333 | MFS transporter                | 30    |
| THAR02_11314    | xaa-Pro aminopeptidase            | 46    | THAR02_11077 | glycosyltransferase family 2   | 35    |
| THAR02_03482    | kinase domain                     | 32    | THAR02_00098 | glycoside hydrolase family 43  | 67    |
| THAR02_03668    | adenine phosphoribosyltransferase | 31    | THAR02_03812 | G-coupled receptor             | 39    |
| THAR02_00283    | NADH dehydrogenase                | 8     | THAR02_04897 | C2H2 transcriptional regulator | 19    |

1127

## XYR1 and CRE1 Response to Cellulose

### Degradation

1128 **Table 3.** Neighbors of the transcripts *xyl1* and *cre1* in Ta0020.

| First neighbors   |                                   |       |                  |                                   |       |
|-------------------|-----------------------------------|-------|------------------|-----------------------------------|-------|
| Ta0020            |                                   |       |                  |                                   |       |
| CRE1              |                                   |       | XYR1             |                                   |       |
| Gene ID           | Description                       | Group | Gene ID          | Description                       | Group |
| 013948456.1_10935 | SH3 domain-containing             | 52    | 013943820.1_6616 | Zn2Cys6 transcriptional regulator | 14    |
| 013938015.1_374   | serine threonine kinase           | 7     | 013943207.1_5652 | replication factor A1             | 17    |
| 013937789.1_299   | ribosomal S18                     | 35    | 013941180.1_3604 | MFS transporter                   | 1     |
| 013949023.1_11526 | pleiotropic drug resistance       | 2     | 013943062.1_5470 | MFS transporter                   | 90    |
| 013946760.1_9261  | MYB DNA-binding domain-containing | 13    | 013941580.1_4080 | glycoside hydrolase family 76     | 1     |
| 013941398.1_3866  | aspartate aminotransferase        | 28    | 013945761.1_8223 | DNA ligase 1                      | 16    |

1129

## CRE1

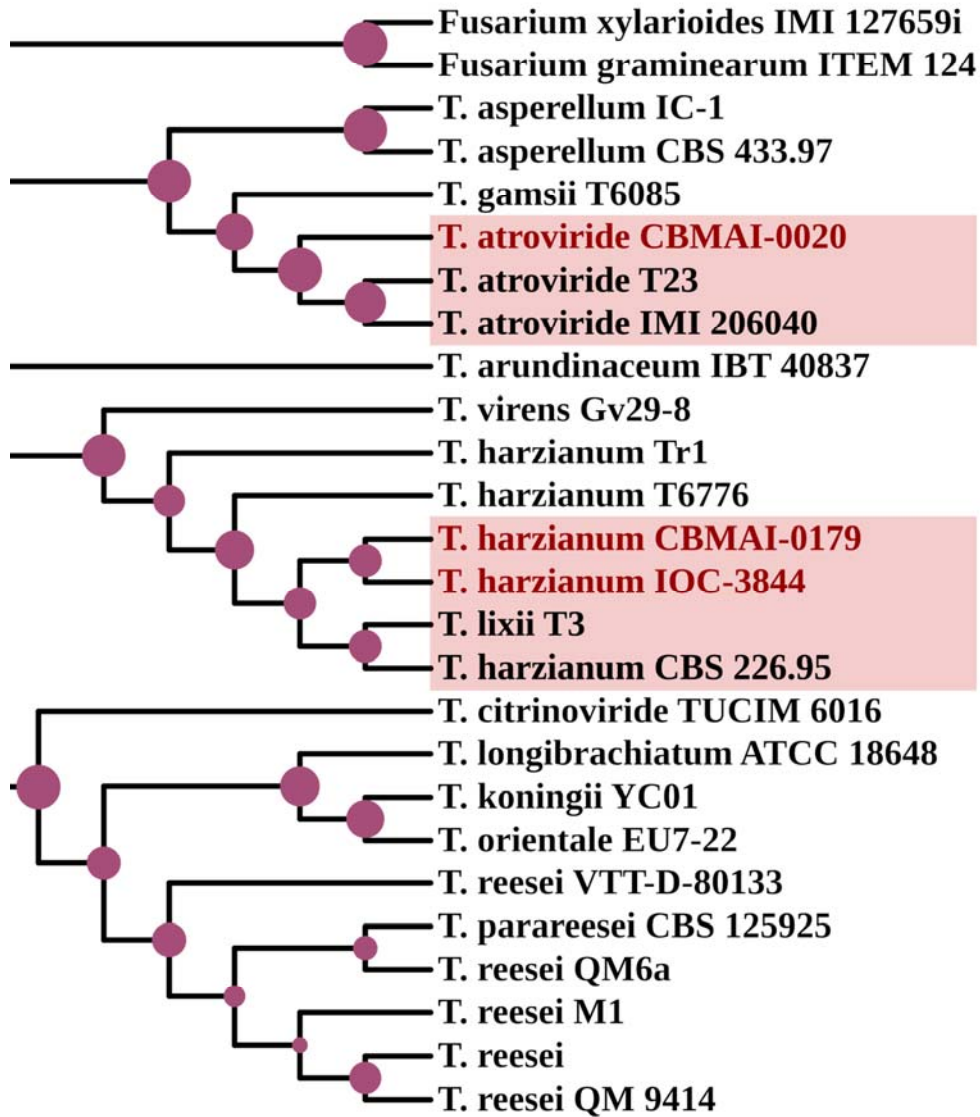

## B

## XYR1

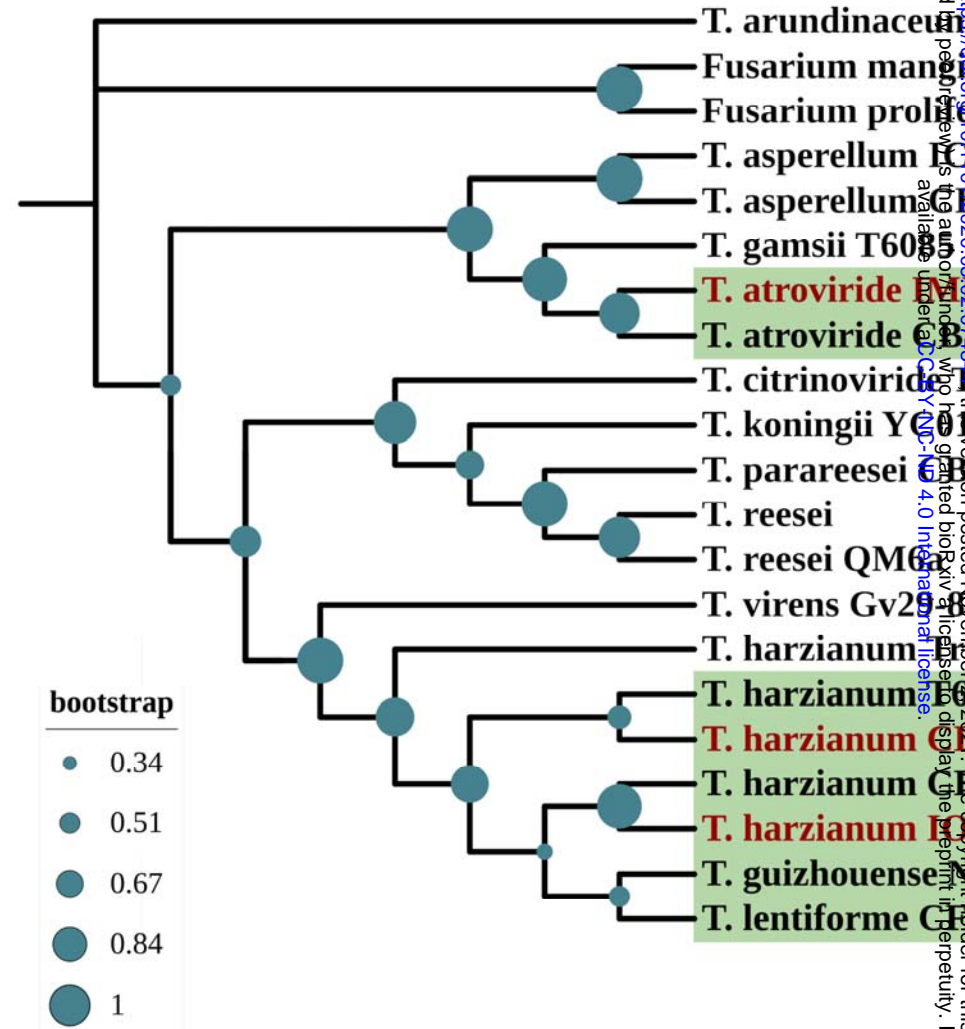



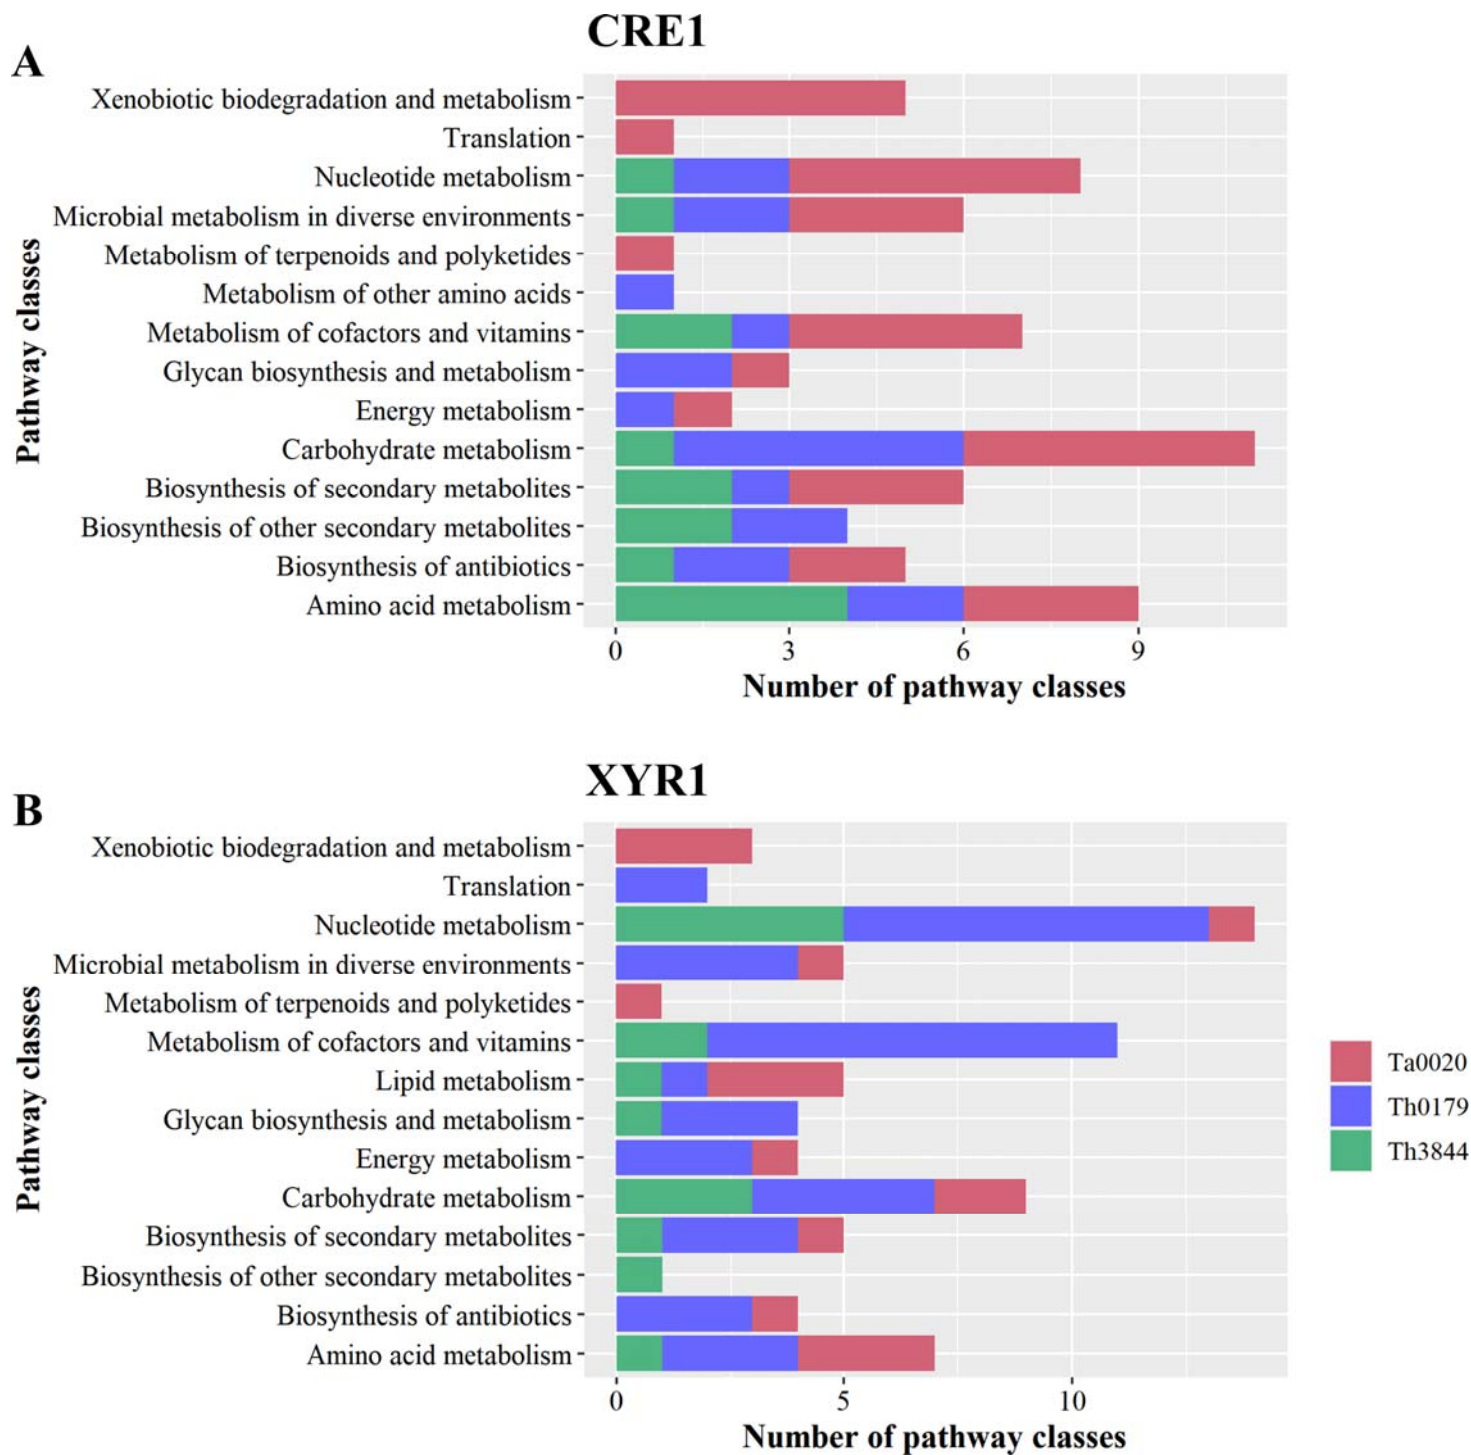

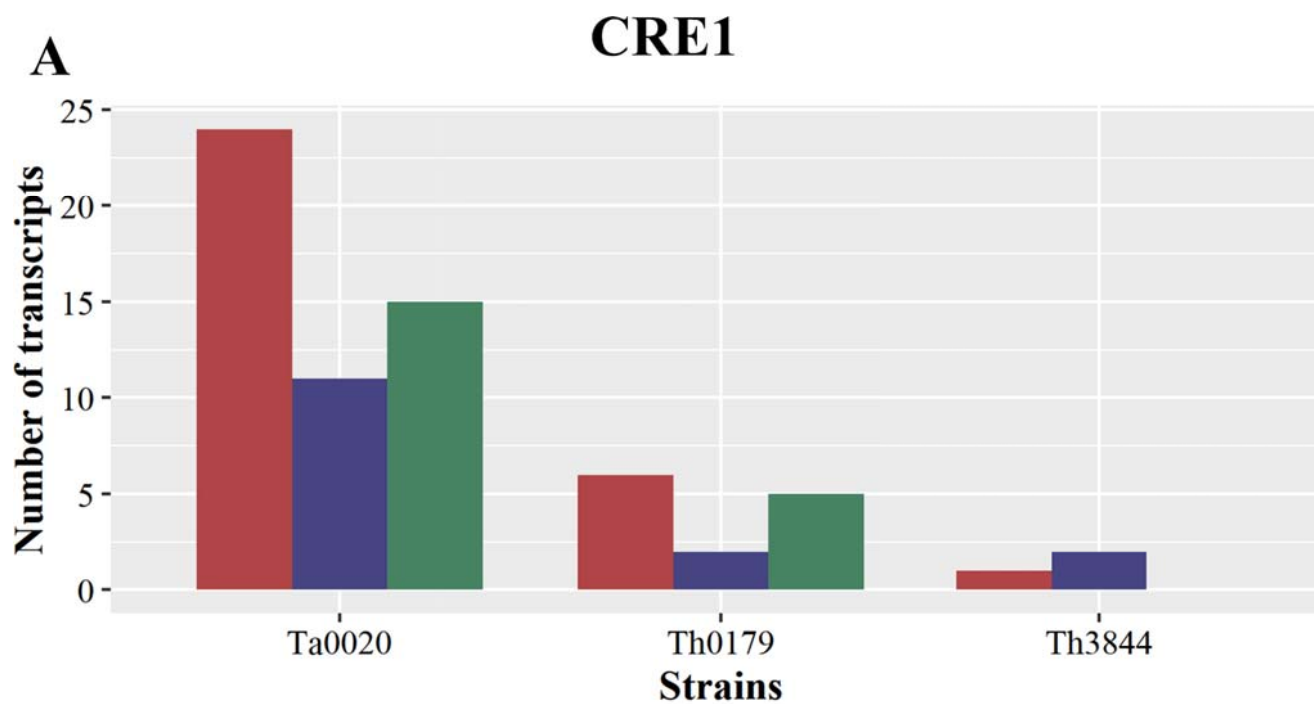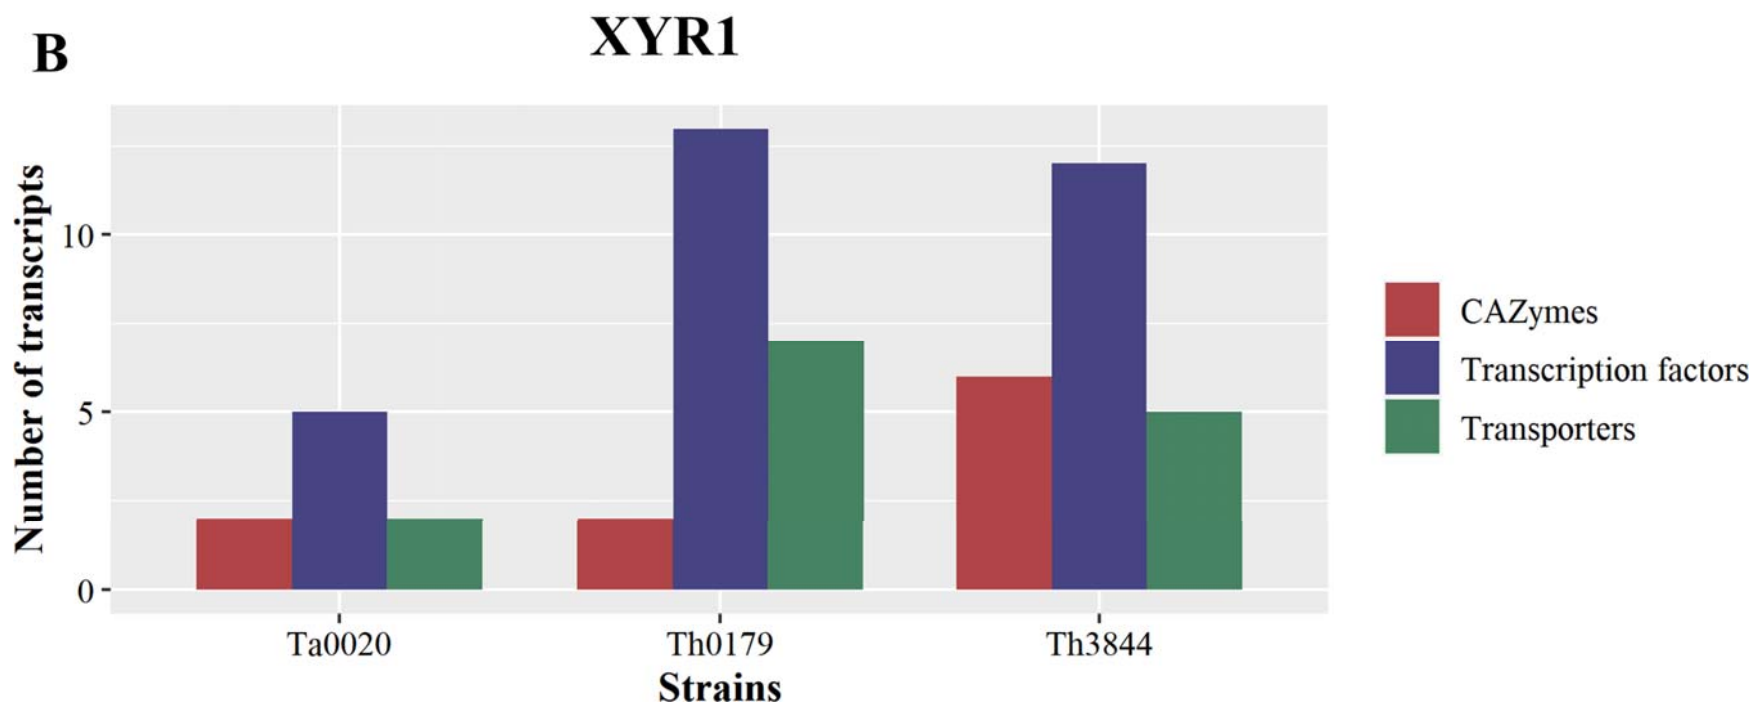

### CRE1

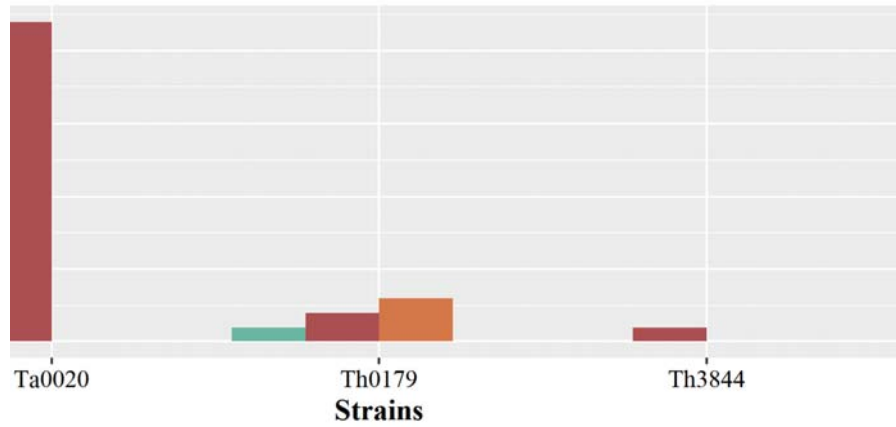

### XYR1

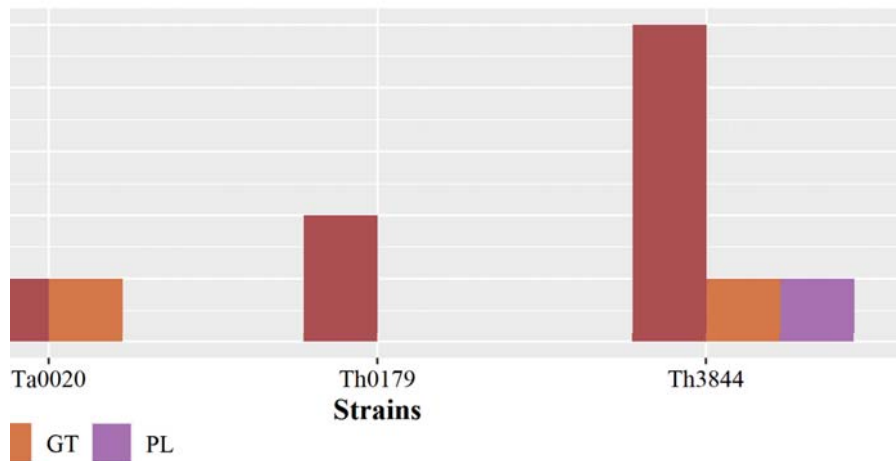

### C

### CRE1

| Strain | GH2 | GH5 | GH12 | GH16 | GH18 | GH23 | GH28 | GH39 | GH44 |
|--------|-----|-----|------|------|------|------|------|------|------|
| Ta0020 | 1   | 1   | 1    | 1    | 4    | 0    | 2    | 1    | 1    |
| Th0179 | 0   | 0   | 0    | 0    | 0    | 1    | 0    | 0    | 0    |
| Th3844 | 0   | 0   | 0    | 0    | 0    | 0    | 1    | 0    | 0    |

  

| Strain | GH64 | GH76 | GH81 | GH92 | GH93 | GH95 | GT90 | CE1 | GH100 |
|--------|------|------|------|------|------|------|------|-----|-------|
| Ta0020 | 1    | 1    | 1    | 2    | 2    | 1    | 0    | 0   | 1     |
| Th0179 | 0    | 0    | 0    | 0    | 0    | 0    | 3    | 1   | 0     |
| Th3844 | 0    | 0    | 0    | 0    | 0    | 0    | 0    | 0   | 0     |

### D

### XYR1

| Strain | GH16 | GH17 | GH18 | GH30 | GH39 | GH75 | GH76 | GT- | GH100 |
|--------|------|------|------|------|------|------|------|-----|-------|
| Ta0020 | 0    | 0    | 0    | 0    | 0    | 1    | 0    | 0   | 1     |
| Th0179 | 1    | 0    | 0    | 0    | 0    | 1    | 1    | 0   | 0     |
| Th3844 | 0    | 1    | 1    | 1    | 1    | 1    | 0    | 1   | 0     |

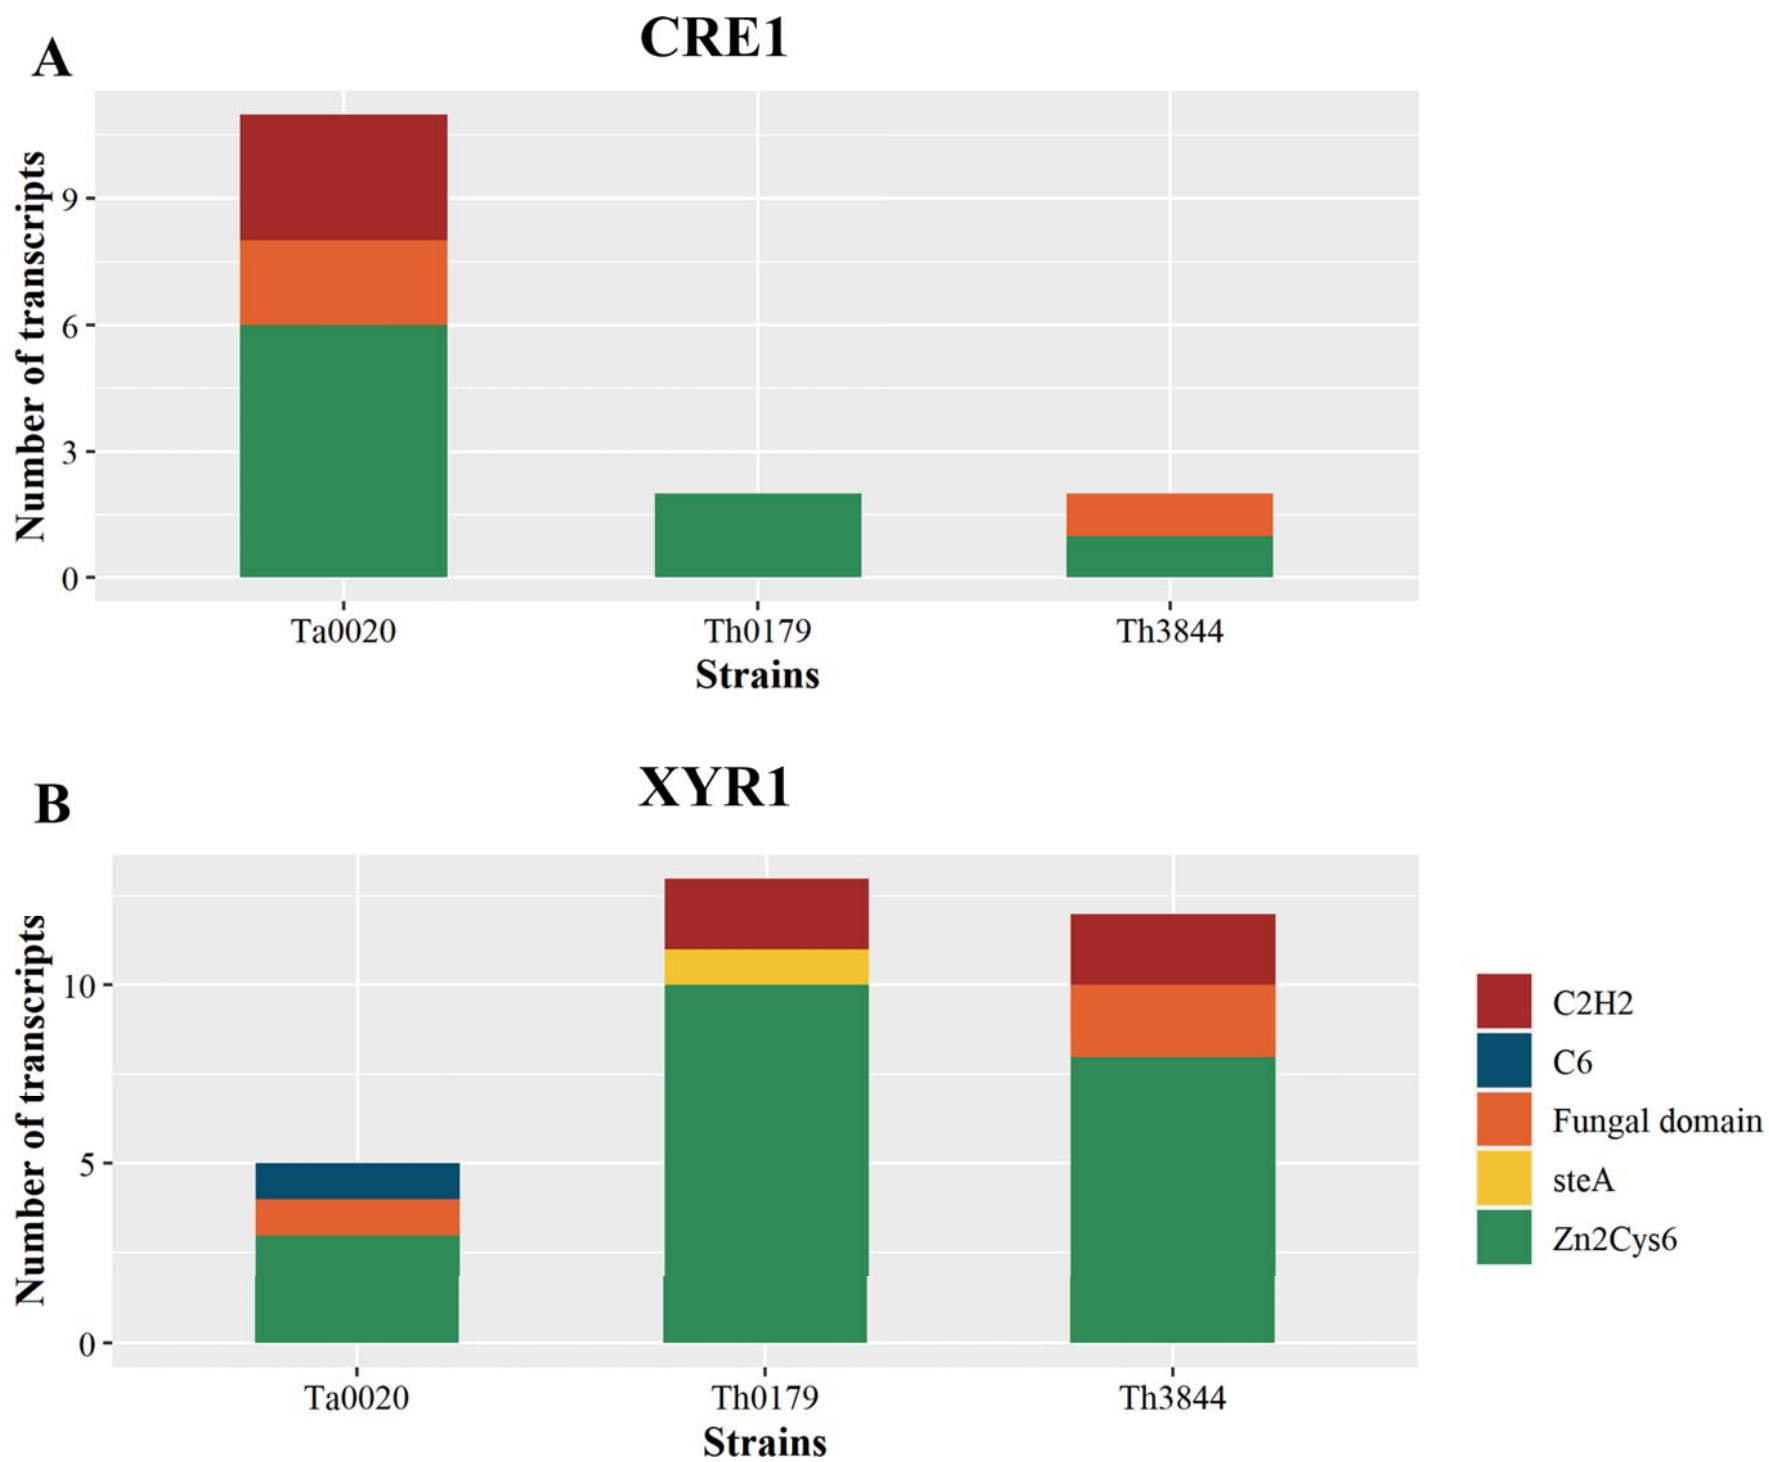

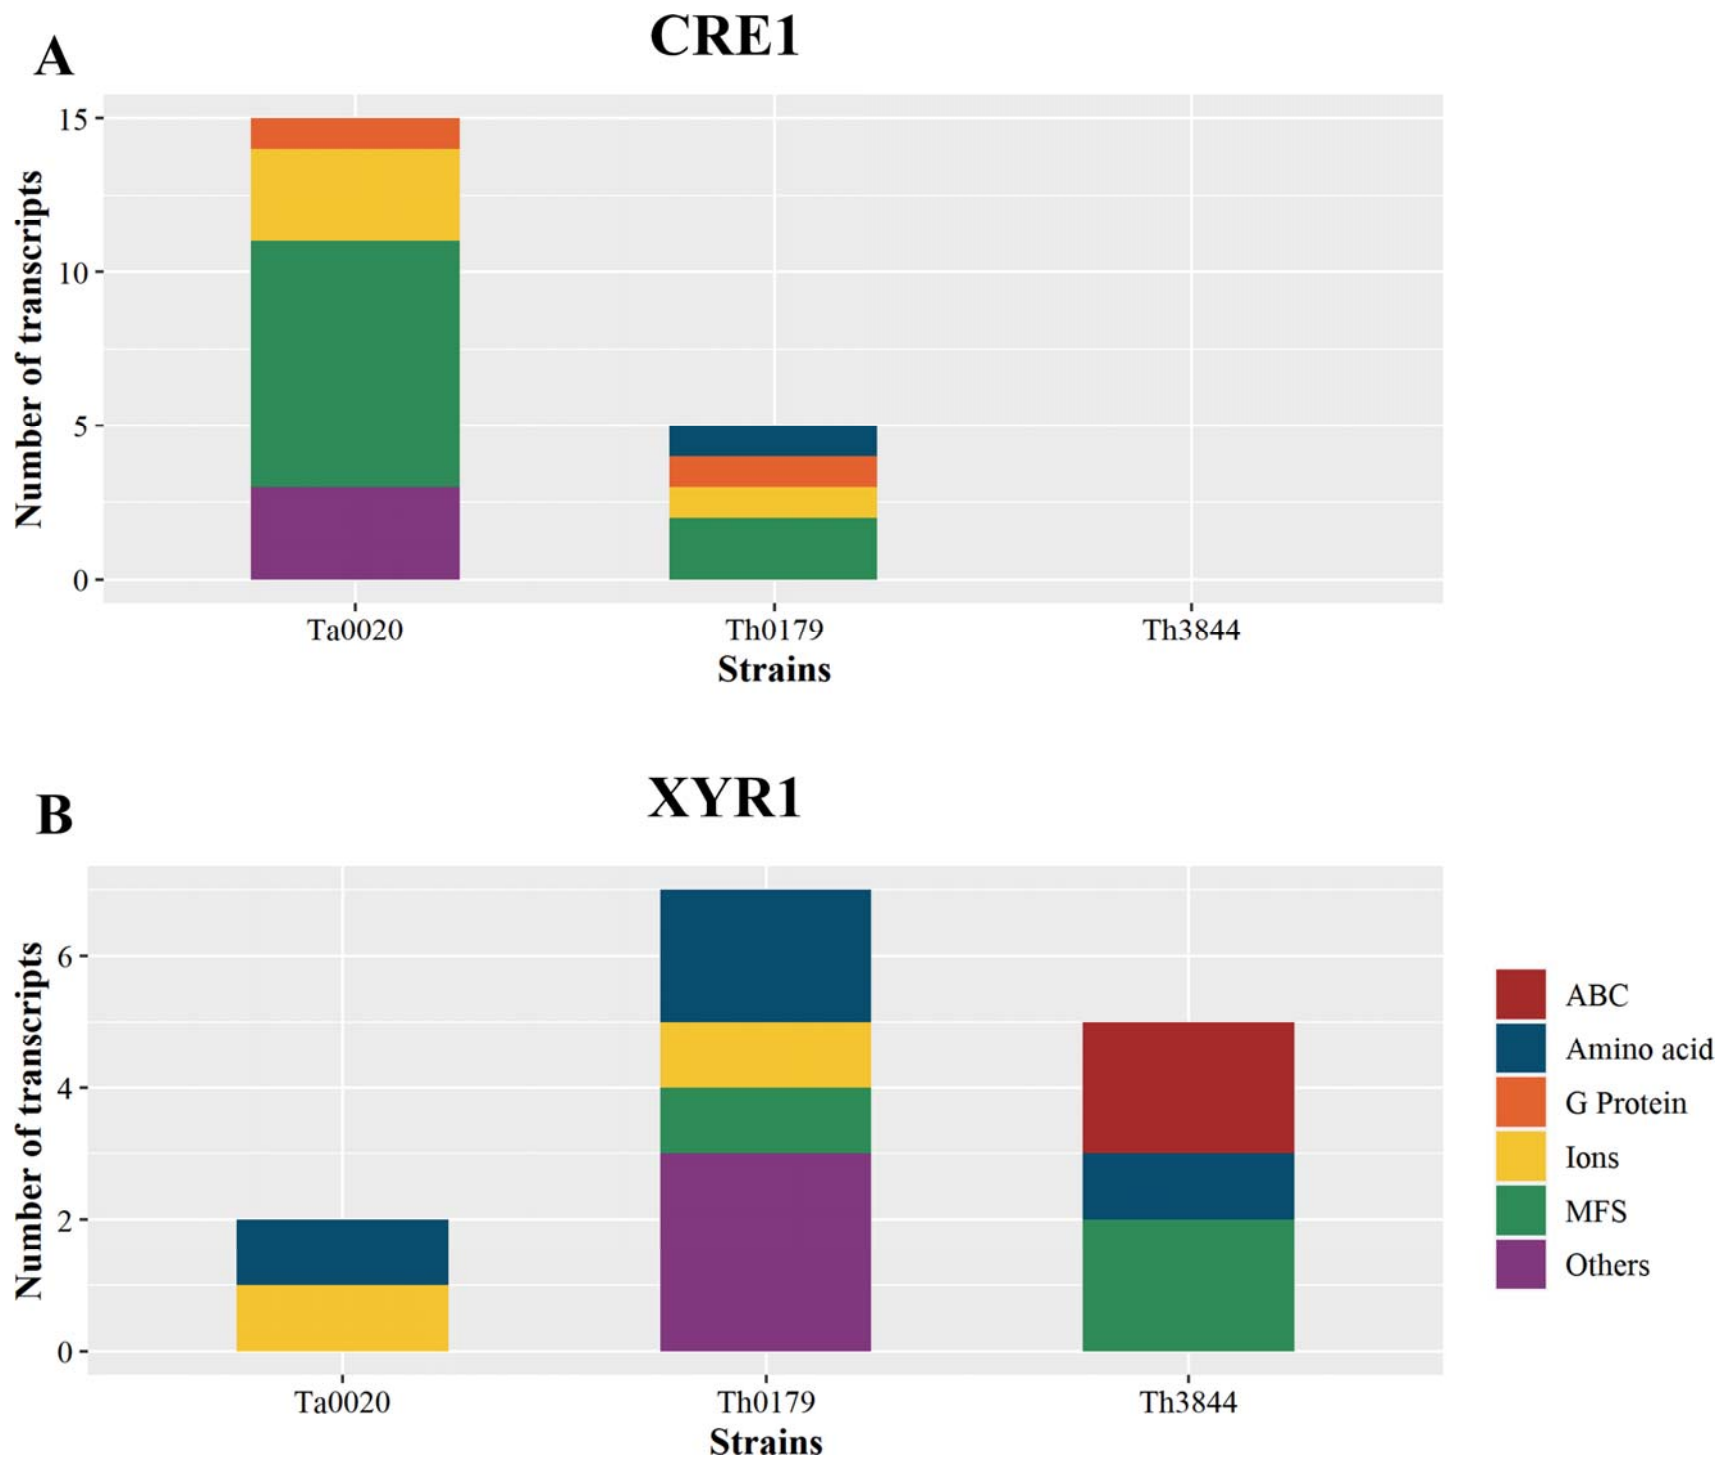

D  
E  
F  
G  
H  
I  
J  
K  
L  
M  
N  
O  
P  
Q  
R  
S  
T  
U  
V  
W  
X  
Y  
Z

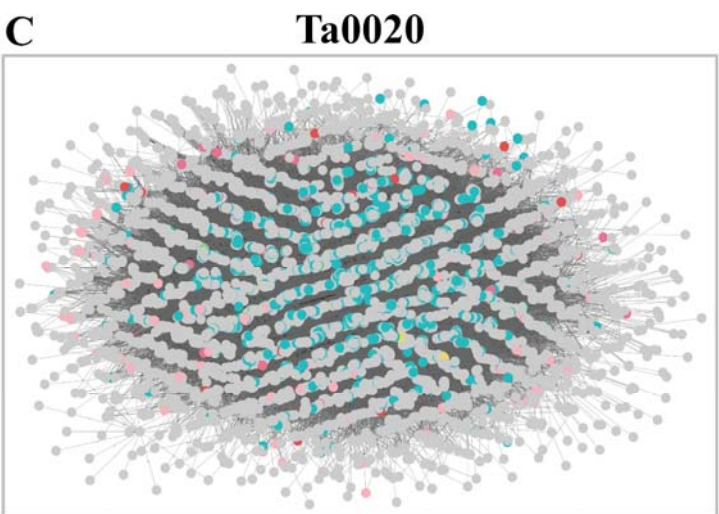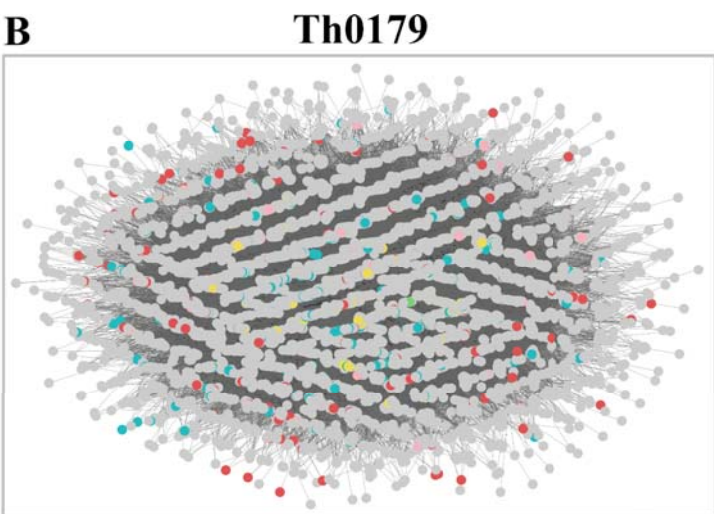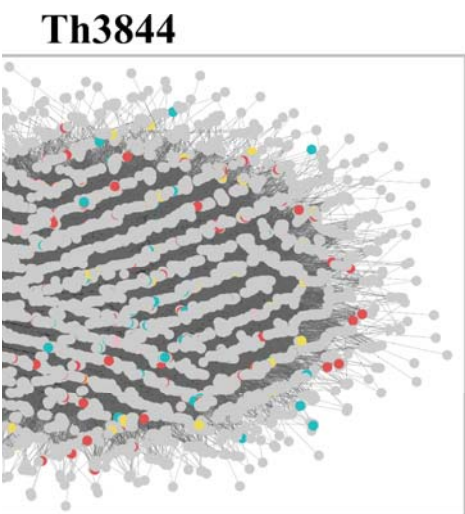

**Th3844**

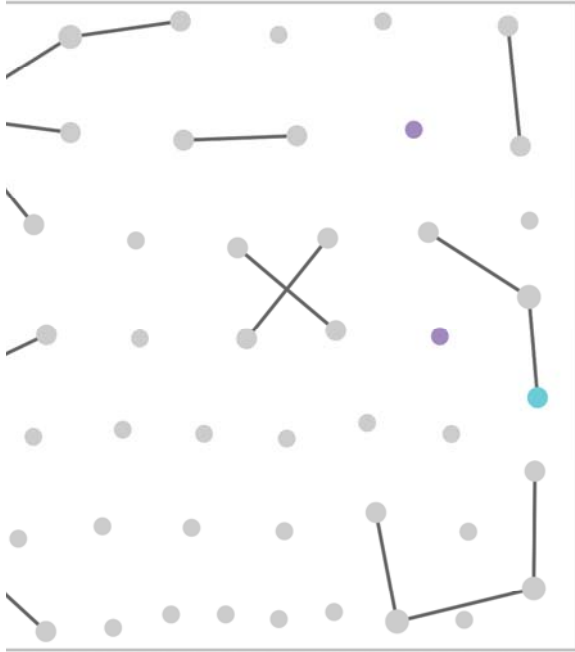

**B**

**Th0179**

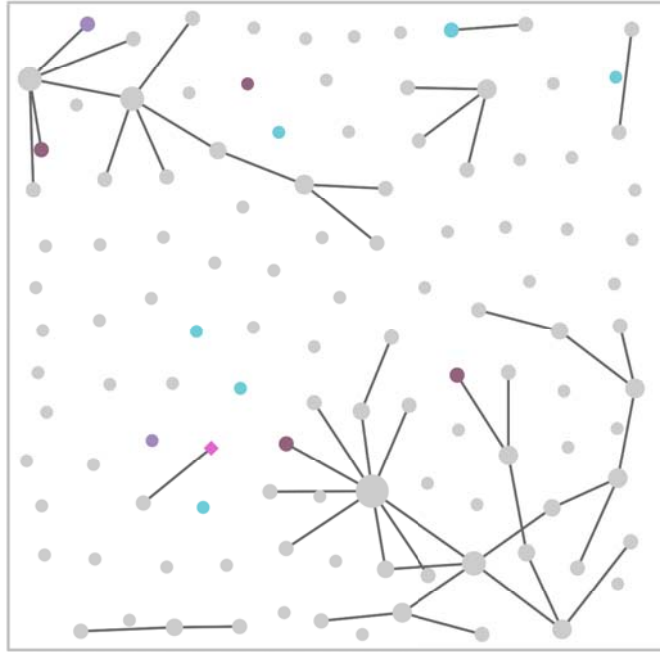

**C**

**Ta0020**

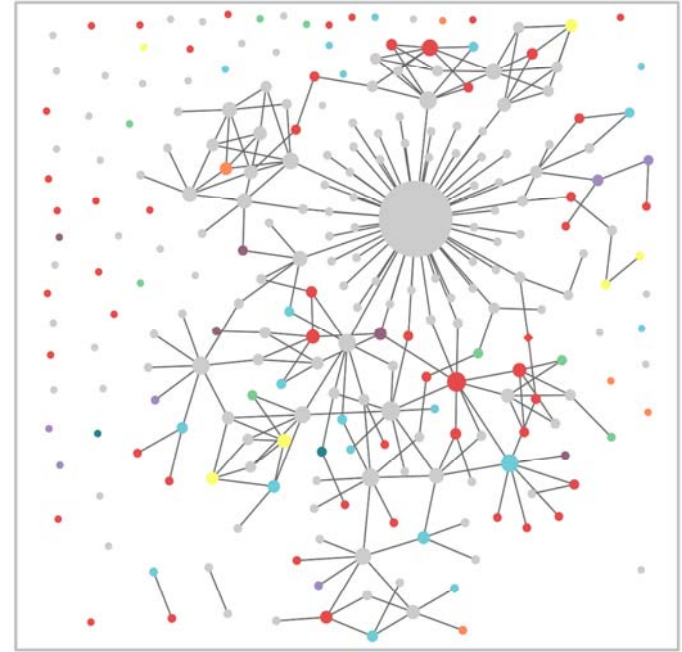

**E**

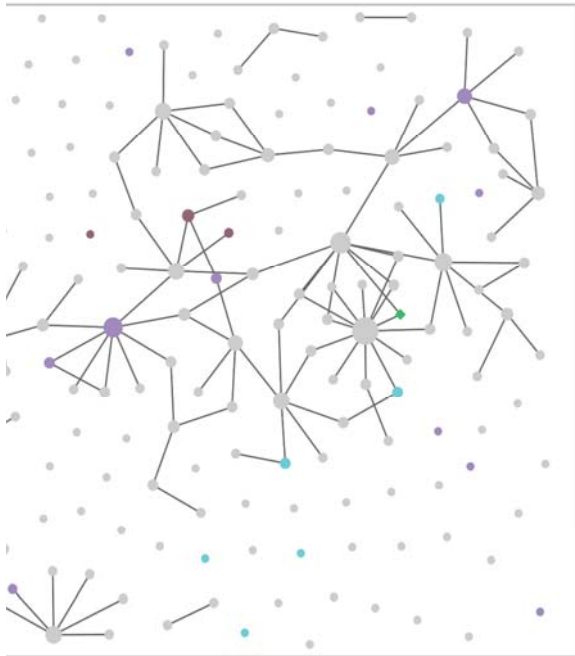

**F**

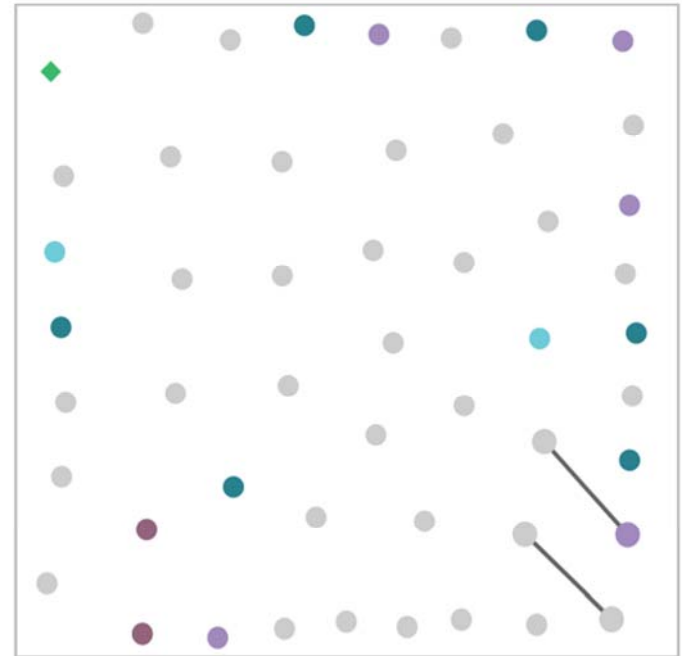

**B**

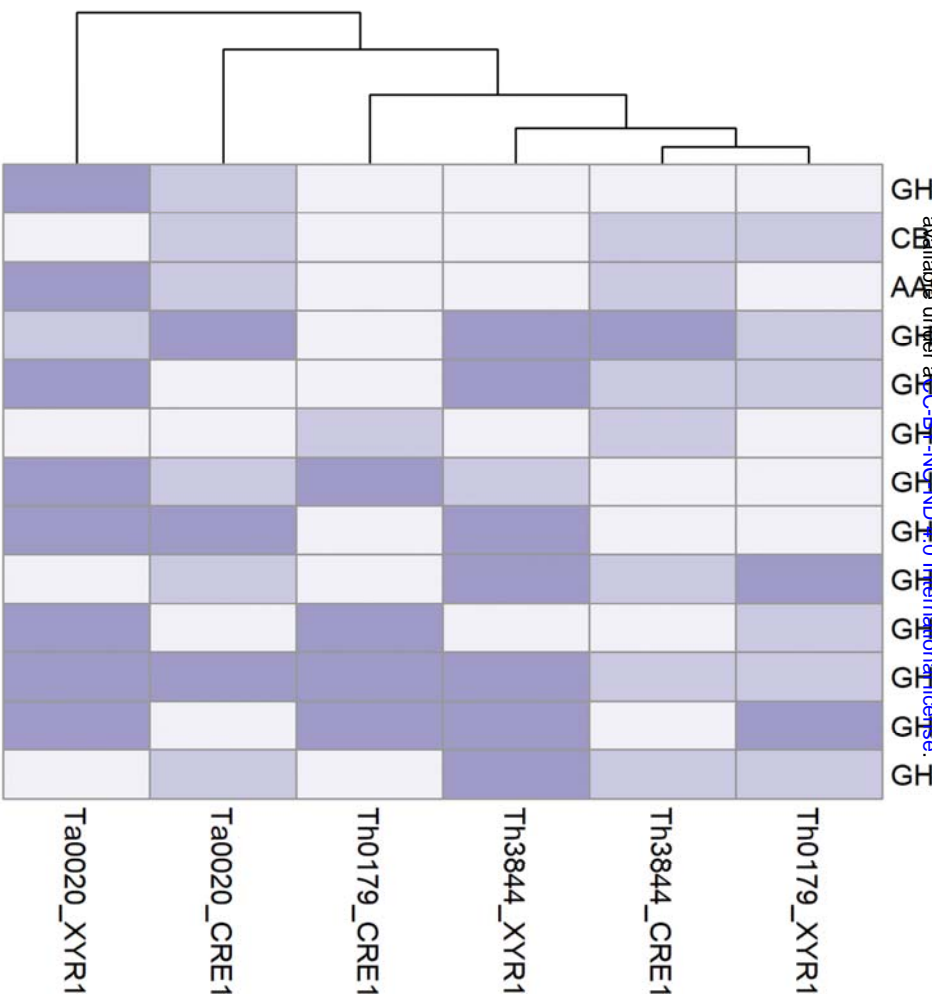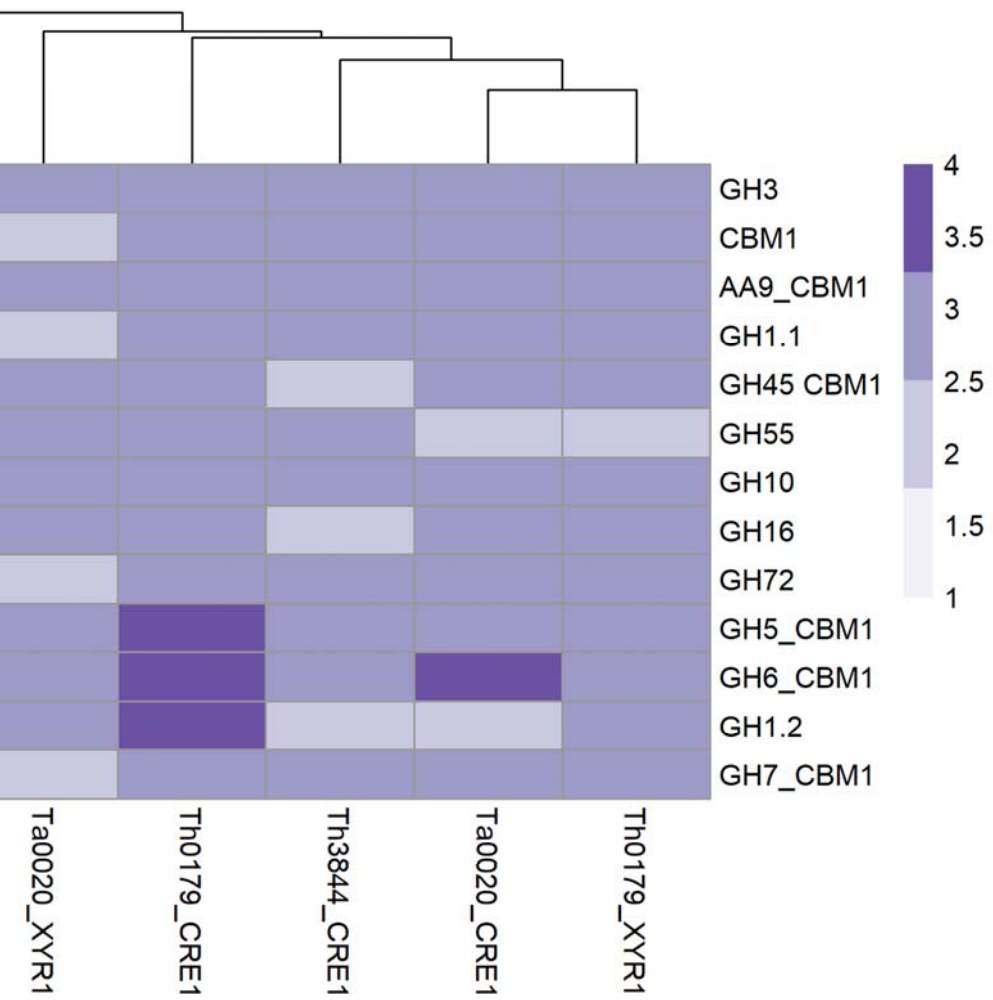

Source: https://www.biorxiv.org/content/10.1101/2020.05.02.074344v6.full.pdf
